# Supplementary material
Source: PubMed Central journal article supplement (PMC4822668)
Supplement: CJN.08020715_CJN08020715SupplementaryData1.pdf [file CJN.08020715_CJN08020715SupplementaryData1.pdf]

**Genetic African ancestry and markers of mineral metabolism in chronic kidney disease:  
findings from the CRIC Study**

Orlando M. Gutiérrez, MD, MMSc,<sup>\*</sup> Afshin Parsa, MD, MPH,<sup>†</sup> Tamara Isakova, MD, MMSc,<sup>‡</sup>  
Julia J. Scialla, MD, MHS,<sup>¶</sup> Jing Chen, MD, MMSc, MSc,<sup>§</sup> John M. Flack, MD, MPH,<sup>¶</sup> Lisa C.  
Nessel, MSS,<sup>\*\*</sup> Jayanta Gupta, MD, PhD,<sup>§§</sup> Keith A. Bellovich, DO,<sup>††</sup> Susan Steigerwalt, MD,<sup>¶¶</sup>  
James H. Sondheimer, MD,<sup>¶</sup> Jackson T. Wright, MD, PhD,<sup>‡‡</sup> Harold I. Feldman, MD, MSCE,<sup>\*\*</sup>  
John W. Kusek, PhD,<sup>¶¶</sup> James P. Lash, MD,<sup>\*†</sup> and Myles Wolf, MD, MMSc<sup>‡</sup>

<sup>\*</sup>Departments of Medicine and Epidemiology, University of Alabama at Birmingham,  
Birmingham, AL; <sup>†</sup>Division of Nephrology, Department of Medicine, University of Maryland  
School of Medicine, Baltimore, MD; <sup>‡</sup>Department of Medicine, Institute of Public Health and  
Medicine, Northwestern University, Chicago, IL; <sup>¶</sup>Division of Nephrology, Department of  
Medicine, Duke University, Durham, NC; <sup>§</sup>Departments of Medicine and Epidemiology, Tulane  
University, New Orleans, LA; <sup>¶¶</sup>Department of Medicine, Wayne State University School of  
Medicine, Detroit, MI; <sup>\*\*</sup>Center for Clinical Epidemiology and Biostatistics, University of  
Pennsylvania, Philadelphia, PA; <sup>§§</sup>Department of Biomedical Sciences, Paul L. Foster School of  
Medicine, Texas Tech University Health Sciences Center, El Paso, TX; <sup>††</sup>Division of  
Nephrology, St. John Hospital Medical Center, Detroit, MI; <sup>¶¶</sup>Department of Medicine, Division  
of Cardiology, University of Michigan, Ann Arbor, MI; <sup>‡‡</sup>Department of Medicine, Case  
Western Reserve University, Cleveland, OH; <sup>¶¶</sup>National Institutes of Health, National Institute of  
Diabetes and Digestive and Kidney Diseases, Bethesda, MD; <sup>\*†</sup>Department of Medicine,  
University of Illinois at Chicago, Chicago, IL;
