# Supplementary material
Source: PubMed Central journal article supplement (PMC4822668)
Supplement: CJN.08020715_CJN08020715SupplementaryData2.pdf [file CJN.08020715_CJN08020715SupplementaryData2.pdf]

**Supplemental Table 1:** List of HapMap 3 based genotyped ancestry informative markers.

| SNP_Name   | Chr | Position  | MAF_Caucasian | MAF_African | MAF_Japanese | MAF_Chinese |
|------------|-----|-----------|---------------|-------------|--------------|-------------|
| rs2008602  | 1   | 218098941 | 0.33          | 0.06        | 0.36         | 0.31        |
| rs1110379  | 1   | 223167277 | 0.11          | 0.06        | 0.24         | 0.24        |
| rs11164273 | 1   | 101942883 | 0.08          | 0.23        | 0.08         | 0.14        |
| rs1181868  | 1   | 3640986   | 0.21          | 0.05        | 0.28         | 0.13        |
| rs12076190 | 1   | 5751626   | 0.10          | 0.12        | 0.25         | 0.18        |
| rs12089641 | 1   | 65316390  | 0.09          | 0.08        | 0.42         | 0.43        |
| rs1334336  | 1   | 88165028  | 0.23          | 0.04        | 0.33         | 0.28        |
| rs1340117  | 1   | 206897234 | 0.04          | 0.28        | 0.35         | 0.26        |
| rs1923949  | 1   | 190814333 | 0.19          | 0.02        | 0.46         | 0.43        |
| rs2003154  | 1   | 110551800 | 0.10          | 0.18        | 0.07         | 0.07        |
| rs2365669  | 1   | 112164168 | 0.33          | 0.07        | 0.43         | 0.24        |
| rs2666839  | 1   | 212882847 | 0.06          | 0.21        | 0.14         | 0.19        |
| rs2759281  | 1   | 203132988 | 0.15          | 0.02        | 0.21         | 0.12        |
| rs290829   | 1   | 97224265  | 0.13          | 0.09        | 0.47         | 0.41        |
| rs3006246  | 1   | 198298703 | 0.18          | 0.13        | 0.03         | 0.00        |
| rs359955   | 1   | 32907361  | 0.18          | 0.18        | 0.23         | 0.22        |
| rs3765337  | 1   | 12265186  | 0.06          | 0.41        | 0.13         | 0.17        |
| rs4908343  | 1   | 27804285  | 0.21          | 0.03        | 0.26         | 0.32        |
| rs493950   | 1   | 226673588 | 0.07          | 0.15        | 0.35         | 0.47        |
| rs595961   | 1   | 36140367  | 0.15          | 0.08        | 0.27         | 0.12        |
| rs596985   | 1   | 64049623  | 0.02          | 0.28        | 0.13         | 0.14        |
| rs630101   | 1   | 234839039 | 0.18          | 0.02        | 0.38         | 0.42        |
| rs6426893  | 1   | 163293966 | 0.21          | 0.18        | 0.28         | 0.21        |
| rs6428492  | 1   | 89240375  | 0.23          | 0.17        | 0.41         | 0.40        |
| rs6586395  | 1   | 232715442 | 0.06          | 0.13        | 0.00         | 0.01        |
| rs6667663  | 1   | 10858024  | 0.02          | 0.13        | 0.36         | 0.46        |
| rs710232   | 1   | 41975741  | 0.01          | 0.18        | 0.27         | 0.26        |
| rs7522389  | 1   | 19845945  | 0.23          | 0.12        | 0.13         | 0.26        |
| rs7525142  | 1   | 238809528 | 0.23          | 0.03        | 0.47         | 0.46        |
| rs7548756  | 1   | 4070109   | 0.17          | 0.14        | 0.46         | 0.49        |
| rs819980   | 1   | 1415563   | 0.06          | 0.12        | 0.35         | 0.47        |
| rs897634   | 1   | 2825552   | 0.27          | 0.08        | 0.41         | 0.47        |
| rs1008984  | 1   | 196597194 | NA            | 0.35        | 0.40         | 0.44        |
| rs2806424  | 1   | 160958083 | 0.27          | 0.19        | 0.49         | 0.41        |
| rs2984915  | 1   | 59026283  | 0.10          | 0.15        | 0.05         | 0.10        |
| rs2985879  | 1   | 59273341  | 0.00          | 0.21        | 0.00         | 0.00        |
| rs10127622 | 1   | 149734684 | 0.11          | 0.19        | 0.13         | 0.16        |
| rs10753143 | 1   | 175363864 | 0.16          | 0.20        | 0.21         | 0.21        |
| rs10789091 | 1   | 61213910  | 0.19          | 0.04        | 0.31         | 0.32        |
| rs10874142 | 1   | 80807368  | 0.14          | 0.22        | 0.43         | 0.41        |
| rs10910821 | 1   | 144228420 | 0.03          | 0.22        | 0.26         | 0.16        |
| rs10911170 | 1   | 181201545 | 0.00          | 0.34        | 0.26         | 0.29        |
| rs10924017 | 1   | 116592124 | 0.06          | 0.13        | 0.43         | 0.40        |
| rs10925911 | 1   | 237774935 | 0.17          | 0.03        | 0.18         | 0.26        |
| rs11161435 | 1   | 84978694  | 0.22          | 0.13        | 0.24         | 0.32        |
| rs11163323 | 1   | 81759046  | 0.16          | 0.06        | 0.40         | 0.48        |

|            |   |           |      |      |      |      |
|------------|---|-----------|------|------|------|------|
| rs11210458 | 1 | 74650713  | 0.30 | 0.07 | 0.19 | 0.16 |
| rs11578123 | 1 | 113157451 | 0.08 | 0.16 | 0.01 | 0.04 |
| rs1158573  | 1 | 72040142  | 0.18 | 0.12 | 0.15 | 0.22 |
| rs12058538 | 1 | 35258172  | 0.03 | 0.12 | 0.38 | 0.36 |
| rs12067308 | 1 | 82738471  | 0.00 | 0.36 | NA   | 0.01 |
| rs1234694  | 1 | 9925907   | 0.14 | 0.15 | 0.35 | 0.41 |
| rs1361903  | 1 | 199565457 | 0.17 | 0.05 | 0.14 | 0.11 |
| rs1389383  | 1 | 100047258 | 0.13 | 0.09 | 0.16 | 0.13 |
| rs1418978  | 1 | 56744312  | 0.24 | 0.14 | 0.35 | 0.16 |
| rs1493365  | 1 | 52790033  | 0.17 | 0.17 | 0.13 | 0.19 |
| rs1553921  | 1 | 202705266 | 0.01 | 0.21 | 0.21 | 0.20 |
| rs1774832  | 1 | 201235937 | 0.12 | 0.11 | 0.32 | 0.29 |
| rs1781022  | 1 | 206531218 | 0.00 | 0.33 | 0.12 | 0.10 |
| rs1962508  | 1 | 160212043 | 0.23 | 0.04 | 0.46 | 0.47 |
| rs2045520  | 1 | 232370592 | 0.07 | 0.04 | 0.18 | 0.09 |
| rs236307   | 1 | 93855505  | 0.09 | 0.06 | 0.11 | 0.09 |
| rs2485579  | 1 | 235338255 | 0.17 | 0.04 | 0.20 | 0.20 |
| rs2506081  | 1 | 192367595 | 0.13 | 0.11 | 0.11 | 0.16 |
| rs260972   | 1 | 39322797  | 0.01 | 0.33 | 0.00 | 0.00 |
| rs2817159  | 1 | 3139268   | 0.16 | 0.03 | 0.42 | 0.34 |
| rs291090   | 1 | 205180660 | 0.03 | 0.21 | 0.14 | 0.10 |
| rs345275   | 1 | 108295326 | 0.12 | 0.33 | 0.25 | 0.17 |
| rs4311917  | 1 | 107527266 | 0.19 | 0.20 | 0.21 | 0.20 |
| rs4631655  | 1 | 182627939 | 0.13 | 0.09 | 0.19 | 0.29 |
| rs4652291  | 1 | 176295334 | 0.15 | 0.04 | 0.13 | 0.21 |
| rs4661630  | 1 | 15670257  | 0.40 | 0.01 | 0.36 | 0.39 |
| rs4920311  | 1 | 18436578  | 0.12 | 0.09 | 0.40 | 0.33 |
| rs4949198  | 1 | 31454201  | 0.23 | 0.05 | 0.41 | 0.41 |
| rs562642   | 1 | 242496768 | 0.08 | 0.15 | 0.44 | 0.36 |
| rs563921   | 1 | 57374971  | 0.22 | 0.15 | 0.26 | 0.32 |
| rs6428291  | 1 | 187592960 | 0.02 | 0.25 | 0.00 | 0.00 |
| rs6587361  | 1 | 228085671 | 0.00 | 0.08 | 0.00 | 0.00 |
| rs6587761  | 1 | 247164683 | 0.03 | 0.16 | 0.13 | 0.16 |
| rs6604611  | 1 | 214721874 | 0.05 | 0.12 | 0.26 | 0.32 |
| rs6662385  | 1 | 72946163  | 0.22 | 0.02 | NA   | 0.18 |
| rs6662563  | 1 | 150739551 | 0.01 | 0.22 | 0.02 | 0.18 |
| rs6663966  | 1 | 53842601  | 0.00 | 0.26 | 0.33 | 0.49 |
| rs667016   | 1 | 47783923  | 0.15 | 0.08 | 0.44 | 0.44 |
| rs6686083  | 1 | 172219162 | 0.21 | 0.03 | 0.43 | 0.46 |
| rs6689895  | 1 | 163859994 | 0.04 | 0.20 | 0.00 | 0.00 |
| rs6694545  | 1 | 30209855  | 0.21 | 0.12 | 0.16 | 0.23 |
| rs6701599  | 1 | 66658094  | 0.25 | 0.04 | 0.07 | 0.04 |
| rs701185   | 1 | 231414609 | 0.34 | 0.06 | NA   | 0.46 |
| rs723632   | 1 | 212126375 | 0.07 | 0.08 | 0.24 | 0.21 |
| rs726777   | 1 | 184139446 | 0.20 | 0.08 | 0.01 | 0.03 |
| rs7523839  | 1 | 115974603 | 0.26 | 0.13 | 0.36 | 0.31 |
| rs7530031  | 1 | 37654747  | 0.03 | 0.25 | 0.00 | 0.00 |
| rs7553137  | 1 | 76709318  | 0.18 | 0.13 | 0.09 | 0.16 |

|            |   |           |      |      |      |      |
|------------|---|-----------|------|------|------|------|
| rs798006   | 1 | 117146711 | 0.05 | 0.12 | 0.31 | 0.22 |
| rs835574   | 1 | 120264753 | 0.13 | 0.03 | 0.02 | 0.07 |
| rs873433   | 1 | 7563975   | 0.09 | 0.29 | 0.03 | 0.14 |
| rs9425309  | 1 | 170653313 | 0.08 | 0.18 | 0.00 | 0.00 |
| rs9428863  | 1 | 239337850 | 0.26 | 0.03 | 0.13 | 0.07 |
| rs947726   | 1 | 99632873  | 0.12 | 0.23 | 0.47 | 0.32 |
| rs9661417  | 1 | 230451674 | 0.01 | 0.26 | 0.18 | 0.21 |
| rs9725312  | 1 | 243105441 | 0.05 | 0.10 | 0.19 | 0.21 |
| rs979698   | 1 | 207764070 | 0.18 | 0.10 | 0.32 | 0.42 |
| rs2387370  | 1 | 246214272 | 0.13 | 0.17 | NA   | 0.29 |
| rs12410334 | 1 | 44215108  | 0.18 | NA   | NA   | NA   |
| rs10171578 | 2 | 104632896 | 0.08 | 0.14 | 0.27 | 0.47 |
| rs10203995 | 2 | 39018558  | 0.06 | 0.13 | NA   | 0.38 |
| rs1025104  | 2 | 86204175  | 0.13 | 0.07 | 0.37 | 0.28 |
| rs11897977 | 2 | 1363732   | 0.07 | 0.24 | 0.31 | 0.27 |
| rs12466967 | 2 | 174052326 | 0.10 | 0.13 | 0.48 | 0.38 |
| rs12472133 | 2 | 158473276 | 0.11 | 0.08 | 0.33 | 0.40 |
| rs13025681 | 2 | 26602008  | 0.16 | 0.06 | 0.43 | 0.31 |
| rs1344185  | 2 | 9207775   | 0.07 | 0.17 | 0.13 | 0.11 |
| rs1444543  | 2 | 80527125  | 0.20 | 0.03 | 0.14 | 0.21 |
| rs1473636  | 2 | 212590435 | 0.07 | 0.21 | 0.08 | 0.04 |
| rs1545216  | 2 | 129811593 | 0.06 | 0.12 | 0.34 | 0.31 |
| rs1852319  | 2 | 6170036   | 0.13 | 0.12 | 0.49 | 0.36 |
| rs1868929  | 2 | 231891835 | 0.05 | 0.34 | 0.49 | 0.40 |
| rs1882646  | 2 | 10949239  | 0.11 | 0.21 | 0.16 | 0.12 |
| rs1979038  | 2 | 148927368 | 0.14 | 0.22 | 0.01 | 0.03 |
| rs260714   | 2 | 108928927 | 0.13 | 0.21 | 0.02 | 0.01 |
| rs2625051  | 2 | 131229320 | 0.14 | 0.07 | 0.43 | 0.39 |
| rs2631941  | 2 | 29834790  | 0.13 | 0.03 | 0.23 | 0.19 |
| rs3755152  | 2 | 216530442 | 0.10 | 0.26 | 0.26 | 0.29 |
| rs4267542  | 2 | 69084554  | 0.03 | 0.14 | 0.43 | 0.46 |
| rs4643526  | 2 | 61038155  | 0.13 | 0.08 | 0.02 | 0.03 |
| rs6710083  | 2 | 192480837 | 0.06 | 0.16 | 0.07 | 0.05 |
| rs6733255  | 2 | 127378856 | 0.06 | 0.10 | 0.21 | 0.22 |
| rs6750983  | 2 | 122995726 | 0.09 | 0.13 | NA   | 0.19 |
| rs736442   | 2 | 21473774  | 0.38 | 0.07 | 0.41 | 0.46 |
| rs7420176  | 2 | 242653950 | 0.11 | 0.23 | 0.40 | 0.50 |
| rs7588415  | 2 | 20987142  | 0.14 | 0.19 | 0.16 | 0.12 |
| rs798443   | 2 | 7885726   | 0.16 | 0.03 | 0.32 | 0.39 |
| rs810066   | 2 | 16752853  | 0.12 | 0.05 | 0.18 | 0.17 |
| rs901303   | 2 | 163124693 | 0.05 | 0.08 | 0.44 | 0.41 |
| rs920249   | 2 | 201020574 | 0.13 | 0.17 | 0.38 | 0.32 |
| rs920525   | 2 | 213694940 | 0.10 | 0.06 | 0.08 | 0.04 |
| rs921599   | 2 | 20654606  | 0.18 | 0.14 | 0.24 | 0.21 |
| rs9309717  | 2 | 3474085   | 0.28 | 0.04 | 0.38 | 0.48 |
| rs951954   | 2 | 109816794 | 0.00 | 0.22 | 0.02 | 0.01 |
| rs10165834 | 2 | 3667580   | 0.00 | 0.18 | 0.00 | 0.00 |
| rs10191837 | 2 | 118681403 | 0.02 | 0.19 | 0.00 | 0.00 |

|            |   |           |      |      |      |      |
|------------|---|-----------|------|------|------|------|
| rs10930443 | 2 | 171428082 | 0.02 | 0.33 | 0.19 | 0.30 |
| rs10932088 | 2 | 205420656 | 0.09 | 0.11 | 0.13 | 0.29 |
| rs10932695 | 2 | 217706325 | 0.08 | 0.20 | 0.34 | 0.32 |
| rs11124405 | 2 | 35041515  | 0.04 | 0.16 | 0.37 | 0.37 |
| rs11674146 | 2 | 104324543 | 0.18 | 0.03 | 0.29 | 0.14 |
| rs11676404 | 2 | 18233052  | 0.14 | 0.15 | 0.21 | 0.14 |
| rs11678181 | 2 | 169167619 | 0.21 | 0.03 | 0.38 | 0.22 |
| rs11689624 | 2 | 36823257  | 0.09 | 0.09 | 0.47 | 0.48 |
| rs11690414 | 2 | 231315948 | 0.05 | 0.29 | 0.26 | 0.06 |
| rs11890727 | 2 | 114383964 | 0.10 | 0.21 | 0.47 | 0.31 |
| rs11894175 | 2 | 214935269 | 0.25 | 0.10 | 0.30 | 0.48 |
| rs12471078 | 2 | 240643938 | 0.44 | 0.04 | 0.26 | 0.21 |
| rs12622045 | 2 | 65709376  | 0.16 | 0.13 | 0.49 | 0.46 |
| rs13000048 | 2 | 178045335 | 0.23 | 0.09 | 0.36 | 0.41 |
| rs1316521  | 2 | 49093646  | 0.13 | 0.19 | 0.25 | 0.20 |
| rs1320149  | 2 | 96857604  | 0.09 | 0.13 | 0.13 | 0.17 |
| rs13385952 | 2 | 41384902  | 0.14 | 0.11 | 0.12 | 0.20 |
| rs13426054 | 2 | 111194437 | 0.03 | 0.28 | 0.03 | 0.04 |
| rs1362663  | 2 | 206477834 | 0.03 | 0.24 | 0.00 | 0.00 |
| rs1437430  | 2 | 117482807 | 0.02 | 0.25 | 0.00 | 0.00 |
| rs1600148  | 2 | 167895993 | 0.20 | 0.10 | 0.46 | 0.43 |
| rs1676038  | 2 | 163958557 | 0.05 | 0.07 | 0.38 | 0.32 |
| rs16859382 | 2 | 219402100 | 0.00 | 0.19 | 0.00 | 0.00 |
| rs17640561 | 2 | 78373558  | 0.20 | 0.11 | 0.21 | 0.06 |
| rs1881244  | 2 | 73498597  | 0.03 | 0.09 | 0.01 | 0.00 |
| rs1996398  | 2 | 171196    | 0.33 | 0.09 | 0.27 | 0.24 |
| rs218174   | 2 | 136374815 | 0.19 | 0.00 | 0.47 | 0.34 |
| rs2215173  | 2 | 234519910 | 0.16 | 0.08 | 0.44 | 0.28 |
| rs2271767  | 2 | 191987572 | 0.04 | 0.24 | 0.13 | 0.09 |
| rs2357320  | 2 | 172792616 | 0.24 | 0.20 | 0.17 | 0.19 |
| rs2362870  | 2 | 177319889 | 0.13 | 0.14 | 0.08 | 0.07 |
| rs2380549  | 2 | 14025329  | 0.06 | 0.15 | 0.34 | 0.40 |
| rs2385622  | 2 | 220408356 | 0.25 | 0.03 | 0.30 | 0.39 |
| rs256550   | 2 | 190452983 | 0.09 | 0.13 | 0.21 | 0.27 |
| rs2683967  | 2 | 564017    | 0.03 | 0.22 | 0.29 | 0.16 |
| rs2861060  | 2 | 66496853  | 0.07 | 0.25 | 0.23 | 0.17 |
| rs287790   | 2 | 122093327 | 0.09 | 0.14 | 0.22 | 0.33 |
| rs288079   | 2 | 210143721 | 0.13 | 0.10 | 0.21 | 0.16 |
| rs3025991  | 2 | 74753315  | 0.11 | 0.02 | 0.13 | 0.18 |
| rs311992   | 2 | 13409519  | 0.13 | 0.08 | 0.22 | 0.31 |
| rs3768641  | 2 | 72221698  | 0.08 | 0.00 | 0.07 | 0.06 |
| rs3856461  | 2 | 8727463   | 0.05 | 0.13 | 0.00 | 0.00 |
| rs3924521  | 2 | 45848685  | 0.14 | 0.20 | 0.02 | 0.02 |
| rs4662260  | 2 | 147065848 | 0.20 | 0.15 | 0.46 | 0.40 |
| rs4672145  | 2 | 56759668  | 0.00 | 0.23 | 0.12 | 0.03 |
| rs4674659  | 2 | 223070724 | 0.09 | 0.18 | 0.02 | 0.03 |
| rs4852696  | 2 | 83005152  | 0.18 | 0.14 | 0.26 | 0.14 |
| rs4954540  | 2 | 138271975 | 0.19 | 0.01 | 0.43 | 0.42 |

|            |   |           |      |      |      |      |
|------------|---|-----------|------|------|------|------|
| rs6434811  | 2 | 196574665 | 0.08 | 0.17 | 0.24 | 0.39 |
| rs6545265  | 2 | 52320634  | 0.02 | 0.31 | 0.38 | 0.42 |
| rs6548031  | 2 | 30838175  | 0.03 | 0.28 | 0.07 | 0.03 |
| rs6705862  | 2 | 139109839 | 0.25 | 0.02 | 0.48 | 0.44 |
| rs6724395  | 2 | 69799572  | 0.01 | 0.28 | 0.00 | 0.00 |
| rs6733811  | 2 | 152254391 | 0.26 | 0.00 | 0.31 | 0.37 |
| rs6733850  | 2 | 15848402  | 0.20 | 0.07 | 0.49 | 0.43 |
| rs6735031  | 2 | 229991554 | 0.05 | 0.25 | NA   | 0.00 |
| rs6736170  | 2 | 88328517  | 0.04 | 0.25 | 0.02 | 0.02 |
| rs6747043  | 2 | 237998990 | 0.13 | 0.13 | 0.26 | 0.18 |
| rs6748661  | 2 | 195391085 | 0.07 | 0.10 | 0.24 | 0.27 |
| rs6761192  | 2 | 222356133 | 0.03 | 0.18 | 0.19 | 0.34 |
| rs700853   | 2 | 107720560 | 0.03 | 0.12 | 0.40 | 0.37 |
| rs723802   | 2 | 157384712 | 0.05 | 0.14 | 0.16 | 0.13 |
| rs744396   | 2 | 224279025 | 0.05 | 0.10 | 0.32 | 0.39 |
| rs7557290  | 2 | 77366079  | 0.02 | 0.18 | 0.11 | 0.18 |
| rs7573626  | 2 | 206052111 | 0.04 | 0.19 | 0.08 | 0.00 |
| rs7582701  | 2 | 46404273  | 0.08 | 0.21 | 0.39 | 0.31 |
| rs7591743  | 2 | 142993238 | 0.12 | 0.03 | 0.42 | 0.49 |
| rs7593448  | 2 | 27302797  | 0.28 | 0.11 | 0.04 | 0.14 |
| rs825943   | 2 | 4780428   | 0.14 | 0.10 | 0.35 | 0.31 |
| rs907109   | 2 | 239231048 | 0.16 | 0.20 | 0.47 | 0.38 |
| rs935925   | 2 | 236879284 | 0.02 | 0.18 | 0.22 | 0.36 |
| rs962646   | 2 | 12304711  | 0.00 | 0.23 | 0.00 | 0.00 |
| rs971414   | 2 | 133398555 | 0.02 | 0.28 | 0.46 | 0.41 |
| rs1027868  | 2 | 234921484 | 0.06 | NA   | 0.01 | 0.00 |
| rs1027858  | 3 | 131785876 | 0.16 | 0.18 | 0.44 | 0.47 |
| rs10933728 | 3 | 195510262 | 0.01 | 0.26 | 0.07 | 0.07 |
| rs1163447  | 3 | 110539441 | 0.08 | 0.08 | 0.24 | 0.34 |
| rs13099104 | 3 | 174130861 | 0.31 | 0.13 | 0.36 | 0.47 |
| rs1349265  | 3 | 24134391  | 0.24 | 0.09 | 0.39 | 0.32 |
| rs155412   | 3 | 1329463   | 0.11 | 0.04 | 0.13 | 0.18 |
| rs1909808  | 3 | 123808157 | 0.09 | 0.21 | 0.17 | 0.20 |
| rs2623382  | 3 | 100550148 | 0.11 | 0.05 | 0.47 | 0.49 |
| rs3762721  | 3 | 13870807  | 0.05 | 0.22 | NA   | NA   |
| rs3796259  | 3 | 142461611 | 0.28 | 0.14 | 0.31 | 0.41 |
| rs641320   | 3 | 139830647 | 0.04 | 0.18 | 0.02 | 0.00 |
| rs6782303  | 3 | 199130633 | 0.18 | 0.08 | 0.22 | 0.19 |
| rs6795607  | 3 | 24606169  | 0.07 | 0.12 | 0.16 | 0.21 |
| rs7622872  | 3 | 61277754  | 0.08 | 0.27 | 0.00 | 0.00 |
| rs7644488  | 3 | 3533481   | 0.09 | 0.20 | 0.46 | 0.31 |
| rs7646807  | 3 | 149664556 | 0.18 | 0.10 | 0.39 | 0.42 |
| rs7653308  | 3 | 193645745 | 0.12 | 0.20 | 0.17 | 0.13 |
| rs833660   | 3 | 62527834  | 0.19 | 0.08 | 0.28 | 0.26 |
| rs9288952  | 3 | 113667715 | 0.03 | 0.11 | 0.28 | 0.27 |
| rs9825026  | 3 | 9092788   | 0.05 | 0.24 | 0.33 | 0.23 |
| rs9868994  | 3 | 176215775 | 0.13 | 0.08 | 0.28 | 0.38 |
| rs10865704 | 3 | 1127576   | 0.10 | 0.13 | 0.00 | 0.00 |

|            |   |           |      |      |      |      |
|------------|---|-----------|------|------|------|------|
| rs11130135 | 3 | 4784618   | 0.11 | 0.18 | 0.50 | 0.48 |
| rs11719375 | 3 | 10681597  | 0.17 | 0.04 | 0.41 | 0.48 |
| rs11721278 | 3 | 72676000  | 0.20 | 0.03 | NA   | 0.29 |
| rs12489482 | 3 | 106062098 | 0.05 | 0.08 | NA   | 0.16 |
| rs1254401  | 3 | 124836431 | 0.02 | 0.06 | 0.30 | 0.29 |
| rs12635307 | 3 | 66603496  | 0.03 | 0.12 | 0.11 | 0.10 |
| rs12638122 | 3 | 2751808   | 0.17 | 0.04 | NA   | 0.37 |
| rs12695349 | 3 | 118639153 | 0.15 | 0.03 | NA   | 0.39 |
| rs1303629  | 3 | 25530110  | 0.18 | 0.01 | NA   | 0.48 |
| rs13093187 | 3 | 64487122  | 0.19 | 0.09 | 0.42 | 0.33 |
| rs1352405  | 3 | 3887946   | 0.02 | 0.23 | 0.11 | 0.16 |
| rs1439013  | 3 | 154064681 | 0.04 | 0.22 | 0.28 | 0.32 |
| rs1494255  | 3 | 87531066  | 0.03 | 0.16 | NA   | 0.33 |
| rs1532541  | 3 | 7028680   | 0.03 | 0.24 | NA   | 0.05 |
| rs1811510  | 3 | 5750231   | 0.03 | 0.05 | 0.21 | 0.17 |
| rs181696   | 3 | 156748798 | 0.25 | 0.14 | 0.40 | 0.34 |
| rs1978396  | 3 | 179085854 | 0.10 | 0.10 | 0.13 | 0.10 |
| rs1978831  | 3 | 160796340 | 0.02 | 0.25 | 0.22 | 0.14 |
| rs2197896  | 3 | 30007534  | 0.04 | 0.16 | 0.28 | 0.36 |
| rs2567648  | 3 | 182441378 | 0.14 | 0.15 | 0.14 | 0.17 |
| rs2811337  | 3 | 131065574 | 0.11 | 0.07 | 0.48 | 0.40 |
| rs3846193  | 3 | 190150859 | 0.02 | 0.20 | 0.13 | 0.16 |
| rs4684404  | 3 | 412533    | 0.02 | 0.28 | NA   | 0.00 |
| rs4955503  | 3 | 136019137 | 0.06 | 0.16 | 0.26 | 0.14 |
| rs604398   | 3 | 59838887  | 0.15 | 0.10 | NA   | 0.00 |
| rs638107   | 3 | 10473198  | 0.21 | 0.13 | NA   | 0.30 |
| rs6442608  | 3 | 16563277  | 0.14 | 0.18 | 0.48 | 0.47 |
| rs6550406  | 3 | 36193079  | 0.19 | 0.06 | 0.24 | 0.27 |
| rs6763642  | 3 | 26724657  | 0.06 | 0.20 | 0.43 | 0.40 |
| rs6793627  | 3 | 190526993 | 0.04 | 0.05 | NA   | 0.24 |
| rs6796127  | 3 | 157597592 | 0.02 | 0.21 | NA   | 0.06 |
| rs6802083  | 3 | 176884408 | 0.14 | 0.08 | 0.16 | 0.16 |
| rs6803163  | 3 | 169410950 | 0.03 | 0.17 | 0.00 | 0.02 |
| rs6806816  | 3 | 116691828 | 0.04 | 0.16 | 0.08 | 0.08 |
| rs6808313  | 3 | 15289028  | 0.02 | 0.16 | NA   | 0.14 |
| rs735739   | 3 | 127476223 | 0.02 | 0.26 | 0.10 | 0.04 |
| rs7431707  | 3 | 117464606 | 0.12 | 0.08 | NA   | 0.18 |
| rs7619670  | 3 | 31361236  | 0.05 | 0.18 | NA   | 0.18 |
| rs7624080  | 3 | 192069672 | 0.14 | 0.17 | NA   | 0.43 |
| rs7627605  | 3 | 12374270  | 0.00 | 0.24 | 0.00 | 0.00 |
| rs7641230  | 3 | 145976472 | 0.06 | 0.09 | NA   | NA   |
| rs7645419  | 3 | 141357284 | 0.02 | 0.20 | 0.01 | 0.02 |
| rs7652410  | 3 | 22008145  | 0.03 | 0.48 | NA   | 0.00 |
| rs9290364  | 3 | 170477876 | 0.03 | 0.10 | 0.35 | 0.46 |
| rs9647366  | 3 | 172568418 | 0.23 | 0.02 | NA   | 0.39 |
| rs9784387  | 3 | 98410453  | 0.01 | 0.10 | NA   | NA   |
| rs9811612  | 3 | 59175320  | 0.08 | 0.16 | 0.48 | 0.35 |
| rs9819105  | 3 | 184461481 | 0.02 | 0.19 | 0.06 | 0.08 |

|            |   |           |      |      |      |      |
|------------|---|-----------|------|------|------|------|
| rs9823203  | 3 | 188357335 | 0.23 | 0.03 | NA   | 0.16 |
| rs9825091  | 3 | 56771066  | 0.09 | 0.16 | 0.44 | 0.50 |
| rs9834934  | 3 | 187204366 | 0.01 | 0.23 | 0.00 | 0.00 |
| rs9838282  | 3 | 35889593  | 0.05 | 0.13 | 0.16 | 0.08 |
| rs9856661  | 3 | 54052296  | 0.20 | 0.16 | 0.43 | 0.39 |
| rs1477844  | 3 | 112312521 | 0.14 | 0.20 | NA   | 0.33 |
| rs12497227 | 3 | 145043220 | 0.05 | NA   | 0.13 | 0.12 |
| rs10016932 | 4 | 131396357 | 0.16 | 0.06 | 0.49 | 0.43 |
| rs10049867 | 4 | 35944064  | 0.07 | 0.13 | 0.00 | 0.06 |
| rs13107001 | 4 | 176636581 | 0.07 | 0.11 | 0.08 | 0.05 |
| rs13146622 | 4 | 177064358 | 0.13 | 0.10 | 0.39 | 0.27 |
| rs1377859  | 4 | 178986081 | 0.13 | 0.11 | 0.32 | 0.38 |
| rs1384720  | 4 | 64958244  | 0.03 | 0.31 | NA   | 0.00 |
| rs1525760  | 4 | 117354829 | 0.08 | 0.08 | 0.08 | 0.08 |
| rs2178603  | 4 | 85309773  | 0.18 | 0.01 | 0.40 | 0.46 |
| rs2407548  | 4 | 152069974 | 0.05 | 0.18 | 0.22 | 0.30 |
| rs2574904  | 4 | 178081562 | 0.09 | 0.17 | 0.03 | 0.05 |
| rs2872795  | 4 | 16939479  | 0.23 | 0.11 | 0.48 | 0.50 |
| rs2877558  | 4 | 171979791 | 0.15 | 0.06 | 0.28 | 0.28 |
| rs4241633  | 4 | 60853243  | 0.20 | 0.08 | 0.28 | 0.48 |
| rs4552452  | 4 | 10033421  | 0.20 | 0.16 | 0.38 | 0.27 |
| rs4623048  | 4 | 41528244  | 0.24 | 0.02 | 0.05 | 0.03 |
| rs4694666  | 4 | 75286706  | 0.06 | 0.11 | 0.09 | 0.17 |
| rs4861584  | 4 | 185102115 | 0.03 | 0.29 | 0.33 | 0.47 |
| rs6534487  | 4 | 126671424 | 0.12 | 0.22 | 0.42 | 0.50 |
| rs6814827  | 4 | 91559691  | 0.12 | 0.06 | 0.39 | 0.38 |
| rs6842695  | 4 | 25470457  | 0.12 | 0.18 | 0.00 | 0.03 |
| rs758973   | 4 | 13148471  | 0.16 | 0.07 | 0.08 | 0.00 |
| rs7657799  | 4 | 105594872 | 0.06 | 0.12 | 0.13 | 0.21 |
| rs7663168  | 4 | 67020209  | 0.18 | 0.11 | 0.07 | 0.02 |
| rs7689639  | 4 | 25184635  | 0.16 | 0.00 | 0.35 | 0.50 |
| rs2724478  | 4 | 17664237  | 0.21 | 0.10 | 0.39 | 0.43 |
| rs10003577 | 4 | 95539102  | 0.02 | 0.26 | 0.30 | 0.17 |
| rs10011443 | 4 | 183181832 | 0.06 | 0.26 | 0.00 | 0.01 |
| rs10016143 | 4 | 149835011 | 0.00 | 0.30 | 0.00 | 0.00 |
| rs10016497 | 4 | 141433672 | 0.18 | 0.14 | 0.30 | 0.36 |
| rs10030779 | 4 | 84562588  | 0.11 | 0.09 | 0.00 | 0.01 |
| rs10032765 | 4 | 63405079  | 0.06 | 0.11 | 0.26 | 0.21 |
| rs10517192 | 4 | 29385947  | 0.09 | 0.15 | 0.50 | 0.46 |
| rs11100741 | 4 | 143166996 | 0.20 | 0.12 | 0.29 | 0.40 |
| rs1113837  | 4 | 41292408  | 0.25 | 0.02 | 0.10 | 0.13 |
| rs1156180  | 4 | 54953926  | 0.11 | 0.12 | 0.00 | 0.01 |
| rs11736748 | 4 | 188279168 | 0.05 | 0.18 | 0.49 | 0.33 |
| rs11736805 | 4 | 159702854 | 0.18 | 0.16 | 0.03 | 0.00 |
| rs11934975 | 4 | 119520599 | 0.08 | 0.20 | 0.16 | 0.17 |
| rs1216400  | 4 | 129731768 | 0.08 | 0.16 | 0.18 | 0.37 |
| rs12503758 | 4 | 114068491 | 0.13 | 0.04 | 0.47 | 0.43 |
| rs13118868 | 4 | 141033688 | 0.21 | 0.04 | 0.30 | 0.36 |

|            |   |           |      |      |      |      |
|------------|---|-----------|------|------|------|------|
| rs1434621  | 4 | 162869105 | 0.17 | 0.03 | 0.47 | 0.36 |
| rs1451115  | 4 | 137421339 | 0.05 | 0.17 | 0.42 | 0.38 |
| rs1500458  | 4 | 21956017  | 0.05 | 0.04 | 0.14 | 0.24 |
| rs1530044  | 4 | 166646861 | 0.12 | 0.16 | 0.33 | 0.32 |
| rs17056945 | 4 | 172652264 | 0.20 | 0.10 | 0.43 | 0.32 |
| rs1712373  | 4 | 82374333  | 0.00 | 0.14 | 0.00 | 0.00 |
| rs17728492 | 4 | 6828771   | 0.27 | 0.09 | 0.03 | 0.01 |
| rs1872861  | 4 | 141975340 | 0.03 | 0.20 | 0.03 | 0.06 |
| rs1877289  | 4 | 184426409 | 0.01 | 0.34 | 0.02 | 0.00 |
| rs2007586  | 4 | 26177321  | 0.00 | 0.22 | 0.08 | 0.03 |
| rs2034371  | 4 | 32706259  | 0.10 | 0.14 | 0.39 | 0.28 |
| rs2199040  | 4 | 69859903  | 0.15 | 0.09 | 0.31 | 0.21 |
| rs2217849  | 4 | 175238599 | 0.01 | 0.17 | 0.36 | 0.28 |
| rs2220061  | 4 | 156758744 | 0.02 | 0.19 | NA   | 0.38 |
| rs2272596  | 4 | 191098985 | 0.00 | 0.41 | 0.17 | 0.07 |
| rs2545258  | 4 | 181924586 | 0.13 | 0.22 | 0.27 | 0.30 |
| rs2635256  | 4 | 149076403 | 0.03 | 0.16 | 0.35 | 0.38 |
| rs3774883  | 4 | 5877498   | 0.15 | 0.09 | 0.23 | 0.29 |
| rs3821920  | 4 | 5392501   | 0.14 | 0.08 | 0.31 | 0.23 |
| rs4689327  | 4 | 6121577   | 0.08 | 0.15 | 0.03 | 0.00 |
| rs4696778  | 4 | 7970208   | 0.37 | 0.02 | 0.24 | 0.13 |
| rs4697843  | 4 | 10704856  | 0.29 | 0.08 | 0.26 | 0.17 |
| rs4865470  | 4 | 1740581   | 0.07 | 0.21 | 0.05 | 0.02 |
| rs6447622  | 4 | 40072321  | 0.11 | 0.17 | 0.17 | 0.24 |
| rs6825164  | 4 | 12050929  | 0.02 | 0.19 | 0.05 | 0.01 |
| rs6827536  | 4 | 3649289   | 0.10 | 0.18 | 0.44 | 0.39 |
| rs6829588  | 4 | 165441421 | 0.09 | 0.12 | 0.31 | 0.24 |
| rs719776   | 4 | 33363055  | 0.08 | 0.03 | 0.36 | 0.38 |
| rs7440570  | 4 | 110605485 | 0.16 | 0.09 | 0.08 | 0.08 |
| rs755961   | 4 | 102418889 | 0.16 | 0.11 | 0.50 | 0.47 |
| rs7662047  | 4 | 103310753 | 0.01 | 0.17 | 0.00 | 0.00 |
| rs7664889  | 4 | 77306728  | 0.05 | 0.20 | 0.38 | 0.23 |
| rs7669299  | 4 | 78666168  | 0.00 | 0.26 | 0.02 | 0.01 |
| rs7683995  | 4 | 157215683 | 0.10 | 0.07 | 0.25 | 0.20 |
| rs7687681  | 4 | 80103440  | 0.15 | 0.08 | 0.06 | 0.07 |
| rs7689126  | 4 | 34476295  | 0.03 | 0.05 | 0.19 | 0.16 |
| rs7689609  | 4 | 72302238  | 0.06 | 0.00 | 0.41 | 0.48 |
| rs7691485  | 4 | 186685470 | 0.08 | 0.07 | 0.17 | 0.22 |
| rs7692206  | 4 | 155326143 | 0.08 | 0.03 | 0.34 | 0.26 |
| rs7694118  | 4 | 134288085 | 0.02 | 0.26 | 0.33 | 0.37 |
| rs7695466  | 4 | 52787034  | 0.00 | 0.16 | 0.00 | 0.00 |
| rs9291432  | 4 | 21589601  | 0.03 | 0.25 | 0.12 | 0.14 |
| rs954456   | 4 | 188703103 | 0.14 | 0.15 | 0.14 | 0.20 |
| rs983763   | 4 | 186218714 | 0.00 | 0.16 | 0.00 | 0.00 |
| rs9968403  | 4 | 83666965  | 0.17 | 0.10 | 0.23 | 0.19 |
| rs1035414  | 5 | 169858373 | 0.24 | 0.11 | 0.39 | 0.21 |
| rs10474347 | 5 | 90602254  | 0.16 | 0.09 | 0.48 | 0.42 |
| rs11747238 | 5 | 4831369   | 0.21 | 0.00 | 0.34 | 0.43 |



|            |   |           |      |      |      |      |
|------------|---|-----------|------|------|------|------|
| rs12109816 | 5 | 19786897  | 0.14 | 0.12 | 0.07 | 0.30 |
| rs13189619 | 5 | 21763249  | 0.18 | 0.04 | NA   | 0.39 |
| rs1382342  | 5 | 115589027 | 0.23 | 0.10 | 0.33 | 0.28 |
| rs17057017 | 5 | 159062695 | 0.13 | 0.08 | 0.23 | 0.21 |
| rs261532   | 5 | 138929546 | 0.24 | 0.01 | 0.17 | 0.13 |
| rs294152   | 5 | 104486852 | 0.06 | 0.19 | 0.05 | 0.11 |
| rs313617   | 5 | 109845448 | 0.09 | 0.04 | 0.38 | 0.47 |
| rs3733778  | 5 | 6544532   | 0.09 | 0.13 | 0.07 | 0.03 |
| rs378257   | 5 | 2571738   | 0.22 | 0.05 | 0.28 | 0.32 |
| rs4143541  | 5 | 5778162   | 0.02 | 0.23 | NA   | 0.39 |
| rs4296785  | 5 | 75746539  | 0.20 | 0.11 | 0.48 | 0.46 |
| rs4513684  | 5 | 147632278 | 0.01 | 0.20 | 0.27 | 0.37 |
| rs4631225  | 5 | 108840383 | 0.12 | 0.13 | 0.22 | 0.36 |
| rs6422347  | 5 | 177795689 | 0.09 | 0.14 | 0.35 | 0.34 |
| rs6556871  | 5 | 94804531  | 0.17 | 0.12 | 0.47 | 0.40 |
| rs6881896  | 5 | 55508312  | 0.14 | 0.12 | 0.36 | 0.46 |
| rs6892396  | 5 | 10386138  | 0.26 | 0.06 | 0.32 | 0.18 |
| rs692843   | 5 | 176188252 | 0.03 | 0.09 | 0.07 | 0.11 |
| rs7712760  | 5 | 64075218  | 0.35 | 0.13 | 0.42 | 0.49 |
| rs7714189  | 5 | 31786103  | 0.25 | 0.07 | 0.10 | 0.14 |
| rs7727623  | 5 | 28248480  | 0.22 | 0.08 | 0.33 | 0.36 |
| rs7729084  | 5 | 174314186 | 0.04 | 0.28 | 0.06 | 0.03 |
| rs7735863  | 5 | 31522297  | 0.09 | 0.32 | 0.49 | 0.43 |
| rs871722   | 5 | 17490494  | 0.24 | 0.04 | 0.21 | 0.08 |
| rs874973   | 5 | 72773651  | 0.09 | 0.11 | 0.47 | 0.49 |
| rs930072   | 5 | 36701828  | 0.10 | 0.05 | 0.35 | 0.30 |
| rs9637838  | 5 | 873185    | 0.09 | 0.13 | 0.44 | 0.36 |
| rs10041728 | 5 | 121164880 | 0.09 | 0.02 | NA   | 0.22 |
| rs10059859 | 5 | 59267064  | 0.11 | 0.10 | 0.10 | 0.09 |
| rs10313    | 5 | 180615011 | 0.04 | 0.04 | 0.33 | 0.19 |
| rs1107776  | 5 | 171955921 | 0.03 | 0.22 | 0.00 | 0.02 |
| rs1150476  | 5 | 6013084   | 0.08 | 0.28 | 0.01 | 0.02 |
| rs11951498 | 5 | 119471746 | 0.00 | 0.07 | NA   | 0.28 |
| rs12514977 | 5 | 173668113 | 0.15 | 0.18 | 0.30 | 0.17 |
| rs12522225 | 5 | 167205850 | 0.25 | 0.04 | 0.46 | 0.44 |
| rs13163249 | 5 | 12838191  | 0.18 | 0.04 | 0.48 | 0.44 |
| rs13357360 | 5 | 11759034  | 0.01 | 0.18 | 0.05 | 0.04 |
| rs13357495 | 5 | 73121422  | 0.02 | 0.26 | 0.16 | 0.20 |
| rs1428473  | 5 | 66589316  | 0.10 | 0.37 | 0.00 | 0.03 |
| rs1462110  | 5 | 152632939 | 0.13 | 0.10 | 0.26 | 0.25 |
| rs1478446  | 5 | 127599798 | 0.03 | 0.19 | 0.40 | 0.42 |
| rs155239   | 5 | 169098506 | 0.06 | 0.28 | 0.21 | 0.17 |
| rs1565807  | 5 | 3018167   | 0.03 | 0.20 | 0.41 | 0.36 |
| rs16877749 | 5 | 79706997  | 0.23 | 0.11 | 0.40 | 0.44 |
| rs16889892 | 5 | 58814133  | 0.08 | 0.18 | 0.22 | 0.23 |
| rs16893878 | 5 | 24768486  | 0.08 | 0.19 | NA   | 0.20 |
| rs170936   | 5 | 8211804   | 0.23 | 0.14 | 0.32 | 0.32 |
| rs17099475 | 5 | 142138783 | 0.05 | 0.14 | 0.29 | 0.21 |

|            |   |           |      |      |      |      |
|------------|---|-----------|------|------|------|------|
| rs1909593  | 5 | 165556477 | 0.05 | 0.13 | 0.23 | 0.17 |
| rs1983366  | 5 | 90133069  | 0.05 | 0.16 | 0.30 | 0.27 |
| rs2416309  | 5 | 112600473 | 0.09 | 0.03 | 0.15 | 0.11 |
| rs2569107  | 5 | 149802040 | 0.01 | 0.31 | NA   | 0.34 |
| rs2914585  | 5 | 121454021 | 0.14 | 0.08 | 0.21 | 0.10 |
| rs2964881  | 5 | 85709177  | 0.21 | 0.08 | 0.16 | 0.28 |
| rs301719   | 5 | 88268671  | 0.03 | 0.16 | 0.00 | 0.03 |
| rs33347    | 5 | 68010277  | 0.02 | 0.36 | 0.49 | 0.48 |
| rs33957    | 5 | 141908017 | 0.17 | 0.02 | 0.49 | 0.44 |
| rs35397    | 5 | 33986873  | 0.02 | 0.04 | 0.01 | 0.03 |
| rs40030    | 5 | 36212631  | 0.11 | 0.08 | 0.32 | 0.36 |
| rs4074332  | 5 | 54176944  | 0.11 | 0.19 | 0.22 | 0.21 |
| rs4455545  | 5 | 77675361  | 0.18 | 0.11 | 0.43 | 0.50 |
| rs4533853  | 5 | 26975681  | 0.01 | 0.28 | NA   | 0.00 |
| rs4551093  | 5 | 162585405 | 0.15 | 0.04 | 0.41 | 0.49 |
| rs4703161  | 5 | 100970354 | 0.02 | 0.13 | 0.06 | 0.02 |
| rs4705411  | 5 | 149411218 | 0.11 | 0.06 | 0.21 | 0.24 |
| rs4868232  | 5 | 172332844 | 0.23 | 0.07 | 0.21 | 0.21 |
| rs4869577  | 5 | 38254937  | 0.08 | 0.10 | NA   | 0.33 |
| rs585638   | 5 | 3993916   | 0.08 | 0.23 | 0.00 | 0.04 |
| rs6452419  | 5 | 80907158  | 0.25 | 0.02 | 0.21 | 0.14 |
| rs6556222  | 5 | 175110027 | 0.07 | 0.08 | 0.00 | 0.08 |
| rs6883434  | 5 | 145020090 | 0.05 | 0.24 | 0.13 | 0.17 |
| rs6883485  | 5 | 57015013  | 0.03 | 0.24 | NA   | 0.24 |
| rs6883840  | 5 | 40322167  | 0.24 | 0.12 | NA   | 0.23 |
| rs6887662  | 5 | 14472552  | 0.09 | 0.18 | 0.00 | 0.00 |
| rs6895226  | 5 | 82150859  | 0.13 | 0.11 | 0.33 | 0.31 |
| rs718359   | 5 | 123736936 | 0.03 | 0.28 | 0.27 | 0.29 |
| rs7445113  | 5 | 117067817 | 0.13 | 0.08 | 0.03 | 0.01 |
| rs7712675  | 5 | 76174323  | 0.05 | 0.20 | 0.05 | 0.07 |
| rs686406   | 6 | 165850143 | 0.20 | 0.08 | 0.31 | 0.29 |
| rs11155751 | 6 | 151137072 | 0.19 | 0.12 | NA   | 0.49 |
| rs11963862 | 6 | 91829068  | 0.12 | 0.10 | 0.39 | 0.40 |
| rs11966261 | 6 | 106409967 | 0.15 | 0.08 | 0.48 | 0.43 |
| rs11966463 | 6 | 22111874  | 0.07 | 0.28 | 0.23 | 0.33 |
| rs1619936  | 6 | 71655266  | 0.17 | 0.10 | NA   | 0.43 |
| rs1923416  | 6 | 89348510  | 0.09 | 0.15 | 0.07 | 0.01 |
| rs195429   | 6 | 37462413  | 0.08 | 0.28 | 0.19 | 0.14 |
| rs197870   | 6 | 95613585  | 0.06 | 0.21 | 0.33 | 0.36 |
| rs1979541  | 6 | 159025401 | 0.12 | 0.24 | 0.07 | 0.08 |
| rs2224391  | 6 | 5205935   | 0.29 | 0.08 | 0.26 | 0.28 |
| rs2504914  | 6 | 12715027  | 0.18 | 0.07 | 0.25 | 0.13 |
| rs2803358  | 6 | 158127916 | 0.28 | 0.03 | 0.17 | 0.08 |
| rs362949   | 6 | 146694047 | 0.03 | 0.20 | 0.16 | 0.10 |
| rs4276549  | 6 | 8825098   | 0.05 | 0.25 | 0.07 | 0.09 |
| rs4507607  | 6 | 134451492 | 0.10 | 0.06 | 0.02 | 0.06 |
| rs505358   | 6 | 151369541 | 0.30 | 0.06 | 0.49 | 0.40 |
| rs619572   | 6 | 42425545  | 0.07 | 0.23 | 0.33 | 0.39 |

|            |   |           |      |      |      |      |
|------------|---|-----------|------|------|------|------|
| rs6456591  | 6 | 10751821  | 0.10 | 0.09 | NA   | 0.08 |
| rs6597398  | 6 | 925237    | 0.07 | 0.22 | 0.13 | 0.12 |
| rs745285   | 6 | 170380250 | 0.18 | 0.08 | 0.42 | 0.44 |
| rs7752055  | 6 | 106067405 | 0.13 | 0.10 | 0.07 | 0.01 |
| rs7766458  | 6 | 54248087  | 0.16 | 0.16 | 0.21 | 0.30 |
| rs7770341  | 6 | 16276393  | 0.03 | 0.24 | 0.35 | 0.27 |
| rs9386887  | 6 | 110754613 | 0.10 | 0.17 | 0.31 | 0.29 |
| rs9388989  | 6 | 132739275 | 0.12 | 0.02 | 0.27 | 0.24 |
| rs1015247  | 6 | 124662213 | 0.20 | 0.06 | 0.47 | 0.41 |
| rs1017643  | 6 | 156835825 | 0.29 | 0.01 | 0.27 | 0.40 |
| rs10872502 | 6 | 139443167 | 0.15 | 0.12 | 0.36 | 0.24 |
| rs10948308 | 6 | 46857996  | 0.05 | 0.18 | 0.19 | 0.17 |
| rs1190286  | 6 | 105717639 | 0.18 | 0.12 | 0.13 | 0.17 |
| rs11962335 | 6 | 35549145  | 0.13 | 0.15 | 0.40 | 0.31 |
| rs11966360 | 6 | 26424961  | 0.11 | 0.16 | NA   | 0.09 |
| rs1204797  | 6 | 116648240 | 0.15 | 0.04 | NA   | 0.38 |
| rs1323200  | 6 | 5814353   | 0.14 | 0.16 | 0.42 | 0.43 |
| rs1325399  | 6 | 164561103 | 0.09 | 0.25 | 0.23 | 0.36 |
| rs1325471  | 6 | 84624394  | 0.04 | 0.14 | 0.24 | 0.33 |
| rs1334601  | 6 | 43761383  | 0.06 | 0.25 | 0.34 | 0.34 |
| rs1341567  | 6 | 76684896  | 0.00 | 0.14 | 0.00 | 0.00 |
| rs1480642  | 6 | 136541221 | 0.01 | 0.08 | NA   | 0.06 |
| rs1573057  | 6 | 73915151  | 0.03 | 0.26 | 0.22 | 0.24 |
| rs209814   | 6 | 12059847  | 0.14 | 0.13 | 0.05 | 0.02 |
| rs2179770  | 6 | 86888966  | 0.04 | 0.15 | 0.32 | 0.19 |
| rs2209247  | 6 | 161802980 | 0.08 | 0.24 | NA   | 0.04 |
| rs222541   | 6 | 95287884  | 0.30 | 0.04 | 0.47 | 0.50 |
| rs2286453  | 6 | 132039491 | 0.15 | 0.17 | 0.38 | 0.33 |
| rs2326248  | 6 | 3632313   | 0.16 | 0.06 | 0.30 | 0.31 |
| rs243123   | 6 | 48741548  | 0.27 | 0.08 | NA   | 0.20 |
| rs276497   | 6 | 137388820 | 0.02 | 0.32 | NA   | 0.00 |
| rs303016   | 6 | 25247443  | 0.15 | 0.02 | 0.09 | 0.09 |
| rs443149   | 6 | 121456469 | 0.16 | 0.10 | 0.32 | 0.27 |
| rs4489173  | 6 | 143457111 | 0.04 | 0.15 | 0.46 | 0.49 |
| rs4896767  | 6 | 145352783 | 0.19 | 0.06 | NA   | 0.48 |
| rs4946888  | 6 | 108437987 | 0.25 | 0.04 | 0.31 | 0.35 |
| rs579240   | 6 | 13467310  | 0.01 | 0.34 | 0.02 | 0.02 |
| rs613998   | 6 | 81256204  | 0.10 | 0.13 | 0.09 | 0.08 |
| rs6455767  | 6 | 162068325 | 0.04 | 0.14 | NA   | 0.04 |
| rs6577     | 6 | 52723374  | 0.07 | 0.23 | 0.27 | 0.20 |
| rs6908632  | 6 | 17505095  | 0.24 | 0.16 | NA   | 0.09 |
| rs6930913  | 6 | 39616773  | 0.33 | 0.08 | NA   | 0.32 |
| rs706913   | 6 | 112160666 | 0.03 | 0.22 | NA   | 0.27 |
| rs736864   | 6 | 131221    | 0.21 | 0.17 | 0.24 | 0.40 |
| rs774290   | 6 | 129086919 | 0.17 | 0.08 | NA   | 0.40 |
| rs7756167  | 6 | 135664698 | 0.05 | 0.08 | NA   | 0.07 |
| rs7757763  | 6 | 44093820  | 0.19 | 0.08 | 0.49 | 0.50 |
| rs7760407  | 6 | 20550287  | 0.08 | 0.17 | 0.05 | 0.08 |

|            |   |           |      |      |      |      |
|------------|---|-----------|------|------|------|------|
| rs857455   | 6 | 14788086  | 0.01 | 0.15 | 0.00 | 0.00 |
| rs927485   | 6 | 44646117  | 0.24 | 0.08 | NA   | 0.09 |
| rs9320960  | 6 | 124139020 | 0.07 | 0.21 | 0.04 | 0.11 |
| rs9444618  | 6 | 64938782  | 0.01 | 0.35 | 0.11 | 0.14 |
| rs9458710  | 6 | 163342276 | 0.01 | 0.27 | 0.09 | 0.03 |
| rs9475487  | 6 | 55933810  | 0.07 | 0.18 | NA   | 0.01 |
| rs9491384  | 6 | 125673258 | 0.32 | 0.17 | NA   | 0.43 |
| rs4870209  | 6 | 153997288 | 0.19 | 0.12 | 0.36 | 0.27 |
| rs10270964 | 7 | 50856620  | 0.05 | 0.21 | NA   | 0.15 |
| rs1525091  | 7 | 14759188  | 0.18 | 0.08 | 0.47 | 0.49 |
| rs187985   | 7 | 23392757  | 0.15 | 0.10 | 0.21 | 0.21 |
| rs2107550  | 7 | 30884888  | 0.16 | 0.11 | NA   | 0.30 |
| rs2110871  | 7 | 77918484  | 0.30 | 0.07 | 0.49 | 0.48 |
| rs260368   | 7 | 46429867  | 0.17 | 0.19 | NA   | 0.33 |
| rs37268    | 7 | 41305505  | 0.18 | 0.04 | 0.43 | 0.44 |
| rs4728417  | 7 | 136790470 | 0.05 | 0.15 | 0.48 | 0.49 |
| rs520556   | 7 | 152334329 | 0.18 | 0.21 | 0.11 | 0.06 |
| rs6461999  | 7 | 27247829  | 0.06 | 0.12 | NA   | NA   |
| rs6464211  | 7 | 151504786 | 0.13 | 0.17 | 0.30 | 0.20 |
| rs6948971  | 7 | 1820789   | 0.20 | 0.11 | 0.35 | 0.24 |
| rs7796821  | 7 | 137165331 | 0.03 | 0.13 | 0.09 | 0.19 |
| rs7798735  | 7 | 10113102  | 0.08 | 0.15 | NA   | 0.28 |
| rs7807771  | 7 | 84986899  | 0.05 | 0.41 | 0.05 | 0.08 |
| rs844684   | 7 | 71132933  | 0.08 | 0.18 | 0.46 | 0.33 |
| rs9784907  | 7 | 92784392  | 0.08 | 0.12 | 0.43 | 0.23 |
| rs10488004 | 7 | 90596172  | 0.23 | 0.20 | NA   | 0.33 |
| rs10225118 | 7 | 54991636  | 0.01 | 0.36 | NA   | 0.00 |
| rs10256829 | 7 | 103469919 | 0.09 | 0.06 | 0.49 | 0.48 |
| rs10262976 | 7 | 117487473 | 0.11 | 0.16 | NA   | 0.28 |
| rs10264353 | 7 | 43287602  | 0.23 | 0.03 | NA   | 0.28 |
| rs10275038 | 7 | 111274262 | 0.17 | 0.04 | NA   | 0.20 |
| rs10480042 | 7 | 25771972  | 0.16 | 0.14 | 0.09 | 0.13 |
| rs10952443 | 7 | 153011411 | 0.04 | 0.24 | 0.07 | 0.04 |
| rs10954631 | 7 | 138190166 | 0.03 | 0.12 | 0.07 | 0.08 |
| rs11763144 | 7 | 151114829 | 0.10 | 0.19 | 0.05 | 0.01 |
| rs11765596 | 7 | 150875025 | 0.26 | 0.04 | NA   | 0.18 |
| rs11771343 | 7 | 13241364  | 0.23 | 0.10 | 0.23 | 0.30 |
| rs11984180 | 7 | 8687755   | 0.08 | 0.23 | NA   | 0.43 |
| rs12533049 | 7 | 114189569 | 0.13 | 0.13 | NA   | 0.30 |
| rs12539620 | 7 | 49180468  | 0.03 | 0.27 | 0.00 | 0.00 |
| rs1294631  | 7 | 7389922   | 0.11 | 0.15 | NA   | 0.17 |
| rs1322849  | 7 | 81919475  | 0.14 | 0.18 | 0.02 | 0.02 |
| rs13237436 | 7 | 79713754  | 0.16 | 0.04 | 0.07 | 0.12 |
| rs1433391  | 7 | 131752057 | 0.05 | 0.11 | 0.19 | 0.25 |
| rs1450881  | 7 | 131483085 | 0.11 | 0.03 | 0.09 | 0.00 |
| rs1525200  | 7 | 108247152 | 0.02 | 0.22 | 0.05 | 0.07 |
| rs17134266 | 7 | 51495291  | 0.04 | 0.28 | 0.17 | 0.19 |
| rs17154865 | 7 | 107483525 | 0.00 | 0.24 | 0.01 | 0.00 |

|            |   |           |      |      |      |      |
|------------|---|-----------|------|------|------|------|
| rs17171649 | 7 | 40065000  | 0.00 | 0.31 | NA   | 0.00 |
| rs17520733 | 7 | 70287725  | 0.08 | 0.03 | NA   | 0.17 |
| rs1861141  | 7 | 153691378 | 0.13 | 0.21 | 0.02 | 0.07 |
| rs1922084  | 7 | 155735321 | 0.03 | 0.24 | 0.03 | 0.02 |
| rs2141360  | 7 | 120847409 | 0.07 | 0.22 | 0.27 | 0.33 |
| rs2249070  | 7 | 138522885 | 0.05 | 0.07 | NA   | NA   |
| rs2395018  | 7 | 98551822  | 0.06 | 0.11 | 0.26 | 0.16 |
| rs239959   | 7 | 75408743  | 0.20 | 0.04 | 0.24 | 0.29 |
| rs2598392  | 7 | 33587424  | 0.23 | 0.05 | NA   | 0.42 |
| rs2882524  | 7 | 9482448   | 0.04 | 0.19 | 0.16 | 0.12 |
| rs2965404  | 7 | 21716027  | 0.23 | 0.05 | NA   | 0.18 |
| rs350650   | 7 | 130368263 | 0.12 | 0.13 | NA   | 0.07 |
| rs37423    | 7 | 15754766  | 0.04 | 0.23 | 0.23 | 0.37 |
| rs3823831  | 7 | 8206962   | 0.08 | 0.06 | NA   | 0.18 |
| rs4383884  | 7 | 19076229  | 0.03 | 0.20 | NA   | 0.00 |
| rs4607549  | 7 | 130984889 | 0.15 | 0.03 | NA   | 0.40 |
| rs4716933  | 7 | 155416948 | 0.09 | 0.14 | 0.00 | 0.07 |
| rs4723627  | 7 | 4329275   | 0.22 | 0.17 | 0.07 | 0.01 |
| rs6463247  | 7 | 44806141  | 0.13 | 0.24 | 0.19 | 0.23 |
| rs6464595  | 7 | 143917966 | 0.11 | 0.04 | NA   | 0.44 |
| rs6465387  | 7 | 92991996  | 0.02 | 0.24 | 0.46 | 0.34 |
| rs6592995  | 7 | 52419260  | 0.18 | 0.05 | 0.39 | 0.35 |
| rs683493   | 7 | 125592537 | 0.15 | 0.15 | NA   | 0.24 |
| rs6967267  | 7 | 12651526  | 0.25 | 0.12 | 0.44 | 0.40 |
| rs6977305  | 7 | 3910076   | 0.17 | 0.03 | 0.07 | 0.13 |
| rs7776819  | 7 | 29097287  | 0.05 | 0.21 | NA   | 0.16 |
| rs7783252  | 7 | 19934640  | 0.24 | 0.03 | NA   | 0.27 |
| rs7802588  | 7 | 83325871  | 0.18 | 0.20 | 0.28 | 0.30 |
| rs7807841  | 7 | 6218983   | 0.03 | 0.24 | 0.02 | 0.03 |
| rs7810092  | 7 | 34363155  | 0.22 | 0.04 | NA   | 0.49 |
| rs7810554  | 7 | 15107715  | 0.14 | 0.00 | 0.44 | 0.42 |
| rs802566   | 7 | 145586816 | 0.03 | 0.03 | 0.10 | 0.04 |
| rs883403   | 7 | 98885914  | 0.16 | 0.04 | NA   | NA   |
| rs975018   | 7 | 149135252 | 0.17 | 0.24 | 0.15 | 0.28 |
| rs1057187  | 8 | 6250491   | 0.19 | 0.28 | 0.33 | 0.40 |
| rs10958604 | 8 | 40132968  | 0.18 | 0.10 | 0.24 | 0.20 |
| rs11136757 | 8 | 4447323   | 0.19 | 0.18 | 0.14 | 0.14 |
| rs11986537 | 8 | 106949825 | 0.17 | 0.04 | 0.36 | 0.38 |
| rs11990769 | 8 | 5041230   | 0.03 | 0.19 | 0.00 | 0.04 |
| rs11993541 | 8 | 8242697   | 0.08 | 0.22 | 0.03 | 0.05 |
| rs11995302 | 8 | 313502    | 0.16 | 0.05 | 0.27 | 0.32 |
| rs11996075 | 8 | 98979463  | 0.19 | 0.07 | 0.13 | 0.12 |
| rs12547950 | 8 | 123685278 | 0.06 | 0.25 | 0.03 | 0.12 |
| rs13439780 | 8 | 56506740  | 0.03 | 0.12 | NA   | 0.13 |
| rs1375781  | 8 | 84135108  | 0.13 | 0.17 | 0.22 | 0.16 |
| rs1514626  | 8 | 132834923 | 0.20 | 0.06 | 0.27 | 0.37 |
| rs1523643  | 8 | 16833606  | 0.06 | 0.04 | NA   | 0.49 |
| rs17840659 | 8 | 111488705 | 0.05 | 0.13 | NA   | 0.09 |

|            |   |           |      |      |      |      |
|------------|---|-----------|------|------|------|------|
| rs1866694  | 8 | 62335222  | 0.14 | 0.11 | 0.17 | 0.10 |
| rs2923419  | 8 | 42585573  | 0.09 | 0.05 | 0.10 | 0.11 |
| rs2948375  | 8 | 12791034  | 0.14 | 0.12 | 0.13 | 0.13 |
| rs2978133  | 8 | 95164339  | 0.26 | 0.17 | 0.32 | 0.50 |
| rs3133745  | 8 | 96603982  | 0.12 | 0.16 | 0.26 | 0.23 |
| rs346617   | 8 | 73406911  | 0.18 | 0.27 | 0.10 | 0.06 |
| rs4237080  | 8 | 34900051  | 0.12 | 0.16 | 0.44 | 0.40 |
| rs4367565  | 8 | 131607137 | 0.14 | 0.11 | 0.34 | 0.36 |
| rs4427136  | 8 | 128949021 | 0.23 | 0.15 | 0.33 | 0.49 |
| rs4437632  | 8 | 69014046  | 0.23 | 0.10 | 0.07 | 0.02 |
| rs4732619  | 8 | 27933188  | 0.25 | 0.09 | NA   | 0.25 |
| rs6558387  | 8 | 144910578 | 0.03 | 0.14 | 0.00 | 0.00 |
| rs6601548  | 8 | 10925506  | 0.07 | 0.07 | 0.01 | 0.00 |
| rs6994682  | 8 | 101490974 | 0.06 | 0.16 | NA   | NA   |
| rs780321   | 8 | 127152877 | 0.23 | 0.14 | 0.02 | 0.03 |
| rs7831261  | 8 | 135416154 | 0.25 | 0.08 | 0.25 | 0.37 |
| rs926105   | 8 | 24776396  | 0.23 | 0.11 | 0.28 | 0.31 |
| rs10093645 | 8 | 59141359  | 0.22 | 0.13 | NA   | 0.15 |
| rs10098971 | 8 | 21364794  | 0.21 | 0.09 | NA   | 0.47 |
| rs10503671 | 8 | 20031453  | 0.17 | 0.13 | 0.47 | 0.36 |
| rs10957516 | 8 | 71281605  | 0.29 | 0.05 | 0.30 | 0.27 |
| rs10957952 | 8 | 81104552  | 0.05 | 0.14 | 0.09 | 0.14 |
| rs11136580 | 8 | 2970182   | 0.08 | 0.09 | 0.41 | 0.41 |
| rs11248217 | 8 | 146139664 | 0.22 | 0.11 | 0.34 | 0.36 |
| rs11786868 | 8 | 77816500  | 0.20 | 0.19 | NA   | 0.47 |
| rs12543473 | 8 | 127850622 | 0.09 | 0.22 | 0.36 | 0.31 |
| rs13251094 | 8 | 126594178 | 0.06 | 0.18 | 0.01 | 0.03 |
| rs1455640  | 8 | 2306617   | 0.03 | 0.41 | 0.00 | 0.00 |
| rs1462906  | 8 | 32016134  | 0.02 | 0.17 | 0.00 | 0.00 |
| rs1480144  | 8 | 16181956  | 0.05 | 0.30 | NA   | 0.22 |
| rs16904950 | 8 | 134638134 | 0.22 | 0.02 | 0.48 | 0.38 |
| rs16932440 | 8 | 67113059  | 0.06 | 0.09 | 0.08 | 0.03 |
| rs17297109 | 8 | 122638614 | 0.13 | 0.12 | 0.00 | 0.04 |
| rs1882852  | 8 | 91363305  | 0.00 | 0.20 | 0.00 | 0.00 |
| rs2570169  | 8 | 75999386  | 0.13 | 0.14 | 0.17 | 0.20 |
| rs2613687  | 8 | 21108828  | 0.22 | 0.07 | NA   | 0.22 |
| rs2669425  | 8 | 105464759 | 0.20 | 0.06 | NA   | 0.30 |
| rs2938203  | 8 | 30250474  | 0.09 | 0.08 | NA   | 0.42 |
| rs3763547  | 8 | 52974896  | 0.08 | 0.04 | NA   | NA   |
| rs425010   | 8 | 17960119  | 0.03 | 0.23 | NA   | 0.41 |
| rs4471082  | 8 | 138204459 | 0.28 | 0.16 | 0.39 | 0.39 |
| rs4602918  | 8 | 2610476   | 0.19 | 0.00 | 0.33 | 0.44 |
| rs4732942  | 8 | 29353437  | 0.18 | 0.04 | 0.26 | 0.24 |
| rs6558052  | 8 | 22329632  | 0.08 | 0.13 | NA   | 0.20 |
| rs7006934  | 8 | 54812636  | 0.08 | 0.01 | 0.46 | 0.40 |
| rs7011715  | 8 | 142488436 | 0.23 | 0.08 | 0.40 | 0.39 |
| rs7017031  | 8 | 139619035 | 0.16 | 0.05 | 0.36 | 0.31 |
| rs7017102  | 8 | 145190636 | 0.07 | 0.21 | 0.00 | 0.00 |

|            |   |           |      |      |      |      |
|------------|---|-----------|------|------|------|------|
| rs7824468  | 8 | 102094827 | 0.07 | 0.23 | NA   | 0.06 |
| rs7836147  | 8 | 126834504 | 0.01 | 0.23 | 0.02 | 0.10 |
| rs882119   | 8 | 1455875   | 0.02 | 0.26 | 0.20 | 0.11 |
| rs9297546  | 8 | 116891444 | 0.03 | 0.16 | NA   | 0.03 |
| rs934649   | 8 | 35837839  | 0.03 | 0.13 | 0.19 | 0.32 |
| rs9792192  | 8 | 60148346  | 0.12 | 0.13 | 0.31 | 0.26 |
| rs999450   | 8 | 82058891  | 0.09 | 0.13 | 0.00 | 0.00 |
| rs12544727 | 8 | 10287569  | 0.09 | 0.43 | 0.24 | 0.23 |
| rs2722459  | 8 | 40525616  | 0.13 | 0.24 | 0.00 | 0.00 |
| rs1932158  | 9 | 104049289 | 0.23 | 0.02 | 0.15 | 0.08 |
| rs10739560 | 9 | 122070665 | 0.02 | 0.19 | 0.15 | 0.08 |
| rs10809101 | 9 | 1048914   | 0.23 | 0.10 | 0.48 | 0.50 |
| rs12378782 | 9 | 4321717   | 0.16 | 0.09 | 0.49 | 0.44 |
| rs1331473  | 9 | 70404546  | 0.21 | 0.18 | 0.24 | 0.32 |
| rs1331675  | 9 | 13167389  | 0.35 | 0.04 | 0.44 | 0.42 |
| rs1887455  | 9 | 37478725  | 0.35 | 0.20 | 0.32 | 0.37 |
| rs1935338  | 9 | 73228986  | 0.23 | 0.05 | NA   | 0.48 |
| rs2230808  | 9 | 106602625 | 0.16 | 0.12 | 0.30 | 0.39 |
| rs324498   | 9 | 9049545   | 0.15 | 0.16 | 0.15 | 0.21 |
| rs3780528  | 9 | 112707098 | 0.16 | 0.23 | 0.03 | 0.02 |
| rs4144636  | 9 | 118802528 | 0.20 | 0.08 | 0.28 | 0.26 |
| rs4879592  | 9 | 32687114  | 0.14 | 0.17 | 0.38 | 0.43 |
| rs5029224  | 9 | 139843620 | 0.01 | 0.26 | 0.00 | 0.00 |
| rs590086   | 9 | 132333480 | 0.10 | 0.15 | 0.00 | 0.00 |
| rs6477733  | 9 | 98664884  | 0.02 | 0.28 | 0.34 | 0.31 |
| rs6559415  | 9 | 80633675  | 0.23 | 0.16 | 0.26 | 0.37 |
| rs7854368  | 9 | 113847462 | 0.26 | 0.17 | 0.35 | 0.40 |
| rs7860423  | 9 | 140075368 | 0.19 | 0.10 | 0.40 | 0.28 |
| rs518116   | 9 | 128755557 | 0.35 | NA   | NA   | NA   |
| rs1009249  | 9 | 132903884 | 0.00 | 0.33 | 0.02 | 0.06 |
| rs10491949 | 9 | 11503866  | 0.00 | 0.25 | 0.00 | 0.00 |
| rs10739459 | 9 | 117909704 | 0.22 | 0.03 | 0.27 | 0.32 |
| rs10756782 | 9 | 16690514  | 0.22 | 0.01 | NA   | NA   |
| rs10757957 | 9 | 30466239  | 0.05 | 0.18 | NA   | NA   |
| rs10758409 | 9 | 36859256  | 0.23 | 0.06 | 0.27 | 0.16 |
| rs10759715 | 9 | 116317116 | 0.11 | 0.19 | 0.42 | 0.42 |
| rs10810130 | 9 | 14294973  | 0.14 | 0.13 | NA   | 0.03 |
| rs10811249 | 9 | 19822327  | 0.15 | 0.06 | NA   | NA   |
| rs10964101 | 9 | 1933156   | 0.06 | 0.07 | 0.41 | 0.39 |
| rs10992623 | 9 | 94870469  | 0.14 | 0.01 | 0.17 | 0.19 |
| rs1412387  | 9 | 25568182  | 0.03 | 0.17 | 0.15 | 0.09 |
| rs1500318  | 9 | 8351445   | 0.16 | 0.11 | 0.07 | 0.08 |
| rs1510283  | 9 | 108735771 | 0.16 | 0.12 | NA   | 0.20 |
| rs1889902  | 9 | 86023458  | 0.22 | 0.08 | 0.42 | 0.36 |
| rs2488597  | 9 | 125031894 | 0.19 | 0.03 | 0.16 | 0.28 |
| rs2593404  | 9 | 17549393  | 0.02 | 0.19 | 0.11 | 0.01 |
| rs3115874  | 9 | 130619159 | 0.25 | 0.04 | 0.34 | 0.31 |
| rs3789882  | 9 | 116709520 | 0.08 | 0.29 | 0.25 | 0.21 |

|            |    |           |      |      |      |      |
|------------|----|-----------|------|------|------|------|
| rs3814134  | 9  | 126307510 | 0.02 | 0.03 | 0.18 | 0.31 |
| rs3849903  | 9  | 33308588  | 0.18 | 0.00 | 0.32 | 0.27 |
| rs439314   | 9  | 26369840  | 0.01 | 0.31 | 0.13 | 0.23 |
| rs449090   | 9  | 10053345  | 0.03 | 0.17 | 0.25 | 0.20 |
| rs4741453  | 9  | 15075778  | 0.05 | 0.22 | NA   | 0.17 |
| rs4878586  | 9  | 27800414  | 0.03 | 0.26 | 0.08 | 0.07 |
| rs4977826  | 9  | 23117562  | 0.07 | 0.10 | 0.13 | 0.13 |
| rs6537934  | 9  | 136651099 | 0.31 | 0.03 | 0.30 | 0.50 |
| rs7041015  | 9  | 134283674 | 0.23 | 0.08 | NA   | 0.22 |
| rs7043596  | 9  | 5699530   | 0.26 | 0.11 | 0.23 | 0.24 |
| rs7853312  | 9  | 100042455 | 0.05 | 0.24 | 0.01 | 0.03 |
| rs7859549  | 9  | 87876805  | 0.21 | 0.09 | 0.13 | 0.14 |
| rs7873820  | 9  | 24873179  | 0.11 | 0.03 | 0.12 | 0.21 |
| rs894823   | 9  | 79268349  | 0.02 | 0.15 | 0.00 | 0.01 |
| rs913258   | 9  | 4867246   | 0.16 | 0.03 | 0.36 | 0.24 |
| rs927524   | 9  | 89082420  | 0.21 | 0.08 | 0.46 | 0.42 |
| rs942136   | 9  | 110126217 | 0.18 | 0.09 | 0.34 | 0.48 |
| rs951577   | 9  | 84229929  | 0.35 | 0.04 | 0.41 | 0.33 |
| rs981197   | 9  | 75594651  | 0.03 | 0.13 | NA   | 0.24 |
| rs2301550  | 9  | 20344796  | 0.03 | 0.28 | 0.22 | 0.28 |
| rs10736103 | 10 | 98086005  | 0.02 | 0.22 | 0.00 | 0.00 |
| rs10761587 | 10 | 52319199  | 0.14 | 0.13 | NA   | 0.19 |
| rs10761835 | 10 | 65562077  | 0.14 | 0.06 | 0.22 | 0.26 |
| rs10764116 | 10 | 37279571  | 0.19 | 0.06 | NA   | 0.28 |
| rs11101394 | 10 | 49475222  | 0.01 | 0.27 | NA   | 0.17 |
| rs1149908  | 10 | 8193828   | 0.10 | 0.25 | 0.27 | 0.31 |
| rs12262718 | 10 | 17383712  | 0.08 | 0.06 | NA   | 0.49 |
| rs1326207  | 10 | 15206911  | 0.30 | 0.01 | 0.11 | 0.16 |
| rs1561662  | 10 | 53910718  | 0.22 | 0.05 | NA   | 0.40 |
| rs1762430  | 10 | 131163189 | 0.06 | 0.20 | 0.44 | 0.32 |
| rs224136   | 10 | 64140681  | 0.13 | 0.16 | 0.31 | 0.21 |
| rs2483852  | 10 | 128840131 | 0.07 | 0.19 | 0.19 | 0.20 |
| rs2776937  | 10 | 33646195  | 0.26 | 0.08 | 0.31 | 0.47 |
| rs593992   | 10 | 34576055  | 0.01 | 0.26 | NA   | 0.05 |
| rs701851   | 10 | 95167692  | 0.22 | 0.01 | 0.22 | 0.38 |
| rs7100028  | 10 | 131538677 | 0.09 | 0.18 | 0.31 | 0.24 |
| rs736141   | 10 | 86006470  | 0.31 | 0.06 | 0.23 | 0.33 |
| rs7908565  | 10 | 76421441  | 0.13 | 0.14 | 0.48 | 0.43 |
| rs9418990  | 10 | 135187956 | 0.18 | 0.07 | 0.44 | 0.49 |
| rs2076974  | 10 | 111810301 | NA   | 0.13 | 0.40 | 0.42 |
| rs7079790  | 10 | 21336969  | NA   | 0.17 | 0.49 | 0.44 |
| rs1341926  | 10 | 6334450   | 0.08 | 0.27 | 0.30 | 0.38 |
| rs2394931  | 10 | 74336071  | 0.04 | 0.19 | 0.33 | 0.26 |
| rs10748736 | 10 | 100267789 | 0.13 | 0.16 | 0.03 | 0.05 |
| rs10749372 | 10 | 122131177 | 0.03 | 0.11 | 0.26 | 0.24 |
| rs10751868 | 10 | 2339357   | 0.04 | 0.18 | 0.48 | 0.44 |
| rs10762276 | 10 | 70722475  | 0.01 | 0.27 | 0.00 | 0.00 |
| rs10764784 | 10 | 130206989 | 0.04 | 0.24 | 0.08 | 0.13 |



|            |    |           |      |      |      |      |
|------------|----|-----------|------|------|------|------|
| rs10786930 | 10 | 108001243 | 0.03 | 0.12 | 0.30 | 0.27 |
| rs10788307 | 10 | 85776789  | 0.18 | 0.14 | 0.36 | 0.38 |
| rs10794743 | 10 | 1401286   | 0.04 | 0.35 | 0.03 | 0.06 |
| rs10900107 | 10 | 44563177  | 0.02 | 0.35 | 0.44 | 0.40 |
| rs11193154 | 10 | 108744739 | 0.00 | 0.26 | 0.00 | 0.00 |
| rs11195536 | 10 | 113101768 | 0.18 | 0.15 | 0.17 | 0.19 |
| rs11197469 | 10 | 117639876 | 0.00 | 0.26 | 0.01 | 0.02 |
| rs11239367 | 10 | 44967018  | 0.18 | 0.28 | 0.02 | 0.22 |
| rs11814448 | 10 | 22355849  | 0.03 | 0.21 | NA   | 0.01 |
| rs12247963 | 10 | 15875255  | 0.02 | 0.22 | NA   | 0.01 |
| rs12268117 | 10 | 57964665  | 0.17 | 0.13 | NA   | 0.26 |
| rs1414090  | 10 | 9430541   | 0.29 | 0.05 | NA   | 0.24 |
| rs1733742  | 10 | 56518858  | 0.31 | 0.12 | 0.49 | 0.45 |
| rs1904630  | 10 | 68768634  | 0.09 | 0.13 | 0.30 | 0.30 |
| rs1911414  | 10 | 55427222  | 0.23 | 0.18 | 0.30 | 0.26 |
| rs201113   | 10 | 11088270  | 0.10 | 0.12 | 0.00 | 0.00 |
| rs2025163  | 10 | 4289104   | 0.09 | 0.13 | 0.19 | 0.16 |
| rs2207657  | 10 | 83592540  | 0.19 | 0.05 | NA   | 0.41 |
| rs2804126  | 10 | 7000618   | 0.05 | 0.33 | 0.00 | 0.00 |
| rs2913116  | 10 | 79698947  | 0.04 | 0.21 | NA   | 0.43 |
| rs2927504  | 10 | 127876453 | 0.15 | 0.06 | 0.16 | 0.20 |
| rs3808907  | 10 | 25282928  | 0.01 | 0.15 | 0.07 | 0.06 |
| rs4012659  | 10 | 50771215  | 0.08 | 0.08 | 0.09 | 0.08 |
| rs4406722  | 10 | 19941019  | 0.16 | 0.13 | 0.20 | 0.22 |
| rs4532970  | 10 | 98623932  | 0.12 | 0.08 | 0.33 | 0.43 |
| rs4623785  | 10 | 12784342  | 0.03 | 0.16 | 0.05 | 0.04 |
| rs4751330  | 10 | 132835434 | 0.18 | 0.13 | 0.41 | 0.46 |
| rs4881055  | 10 | 3043366   | 0.08 | 0.05 | 0.09 | 0.04 |
| rs570677   | 10 | 80292362  | 0.17 | 0.09 | 0.47 | 0.40 |
| rs6482313  | 10 | 23984216  | 0.16 | 0.00 | NA   | 0.24 |
| rs6583810  | 10 | 94106213  | 0.11 | 0.13 | 0.46 | 0.38 |
| rs6599662  | 10 | 124932796 | 0.02 | 0.16 | 0.31 | 0.39 |
| rs670283   | 10 | 105917100 | 0.00 | 0.25 | 0.00 | 0.00 |
| rs7069367  | 10 | 84064956  | 0.16 | 0.03 | NA   | 0.34 |
| rs7895530  | 10 | 91577329  | 0.12 | 0.13 | 0.19 | 0.27 |
| rs7896396  | 10 | 77184781  | 0.14 | 0.04 | 0.27 | 0.46 |
| rs7908387  | 10 | 120818959 | 0.02 | 0.46 | 0.17 | 0.14 |
| rs7908735  | 10 | 113962396 | 0.15 | 0.05 | 0.35 | 0.27 |
| rs796829   | 10 | 29153703  | 0.13 | 0.10 | 0.29 | 0.32 |
| rs816627   | 10 | 608409    | 0.07 | 0.16 | 0.14 | 0.30 |
| rs992528   | 10 | 118152572 | 0.06 | 0.09 | 0.47 | 0.49 |
| rs1030774  | 11 | 38454177  | 0.05 | 0.13 | 0.28 | 0.39 |
| rs10750836 | 11 | 68572099  | 0.01 | 0.22 | 0.42 | 0.46 |
| rs10768140 | 11 | 35467483  | 0.25 | 0.11 | 0.30 | 0.30 |
| rs10792837 | 11 | 85583363  | 0.14 | 0.11 | 0.24 | 0.30 |
| rs12807847 | 11 | 26699252  | 0.05 | 0.12 | 0.19 | 0.16 |
| rs1442449  | 11 | 99671000  | 0.10 | 0.14 | 0.33 | 0.25 |
| rs1452673  | 11 | 96757835  | 0.25 | 0.05 | 0.06 | 0.01 |

|            |    |           |      |      |      |      |
|------------|----|-----------|------|------|------|------|
| rs1561937  | 11 | 25541756  | 0.07 | 0.10 | 0.04 | 0.02 |
| rs2403595  | 11 | 12341885  | 0.08 | 0.12 | 0.15 | 0.03 |
| rs2905495  | 11 | 60597857  | 0.09 | 0.08 | 0.09 | 0.07 |
| rs4378393  | 11 | 21560867  | 0.07 | 0.14 | 0.19 | 0.23 |
| rs4622301  | 11 | 110301295 | 0.20 | 0.09 | 0.42 | 0.38 |
| rs549272   | 11 | 30419686  | 0.15 | 0.17 | 0.48 | 0.44 |
| rs7103514  | 11 | 117325771 | 0.08 | 0.22 | 0.41 | 0.29 |
| rs7111814  | 11 | 72613473  | 0.22 | 0.01 | 0.17 | 0.25 |
| rs7933164  | 11 | 4050526   | 0.11 | 0.10 | 0.18 | 0.31 |
| rs7947368  | 11 | 6543804   | 0.05 | 0.18 | 0.03 | 0.00 |
| rs800336   | 11 | 2429707   | 0.22 | 0.02 | 0.33 | 0.41 |
| rs905646   | 11 | 87993450  | 0.18 | 0.10 | 0.40 | 0.48 |
| rs1031763  | 11 | 39886885  | 0.07 | 0.10 | 0.14 | 0.23 |
| rs103610   | 11 | 130918629 | 0.18 | 0.15 | 0.19 | 0.21 |
| rs10765838 | 11 | 11326144  | 0.00 | 0.33 | 0.00 | 0.00 |
| rs10768634 | 11 | 5149986   | 0.08 | 0.23 | 0.23 | 0.24 |
| rs10793379 | 11 | 70408796  | 0.13 | 0.08 | 0.24 | 0.18 |
| rs10833134 | 11 | 19584103  | 0.06 | 0.08 | 0.31 | 0.19 |
| rs10837800 | 11 | 42241041  | 0.18 | 0.01 | 0.21 | 0.21 |
| rs10893538 | 11 | 125927580 | 0.01 | 0.36 | 0.00 | 0.00 |
| rs11024739 | 11 | 18602419  | 0.31 | 0.11 | 0.35 | 0.47 |
| rs1150349  | 11 | 95178426  | 0.06 | 0.24 | 0.03 | 0.02 |
| rs12273026 | 11 | 119955531 | 0.01 | 0.28 | 0.13 | 0.13 |
| rs1384508  | 11 | 7705050   | 0.33 | 0.03 | 0.48 | 0.42 |
| rs1532007  | 11 | 98350841  | 0.11 | 0.18 | 0.42 | 0.40 |
| rs1607559  | 11 | 23642182  | 0.05 | 0.26 | 0.02 | 0.00 |
| rs1942662  | 11 | 124037710 | 0.01 | 0.33 | 0.19 | 0.12 |
| rs2071168  | 11 | 61063505  | 0.01 | 0.17 | 0.11 | 0.13 |
| rs2226633  | 11 | 131825604 | 0.05 | 0.27 | 0.11 | 0.28 |
| rs2507874  | 11 | 114433145 | 0.13 | 0.18 | 0.39 | 0.44 |
| rs2514895  | 11 | 126615393 | 0.16 | 0.18 | 0.33 | 0.31 |
| rs2553779  | 11 | 35033124  | 0.22 | 0.12 | NA   | 0.33 |
| rs3740677  | 11 | 77605684  | 0.15 | 0.13 | 0.22 | 0.22 |
| rs3740767  | 11 | 76379254  | 0.22 | 0.13 | 0.22 | 0.26 |
| rs4148636  | 11 | 17383939  | 0.09 | 0.15 | 0.13 | 0.03 |
| rs4631865  | 11 | 40810971  | 0.24 | 0.11 | 0.17 | 0.16 |
| rs4752805  | 11 | 47974931  | 0.16 | 0.03 | 0.19 | 0.28 |
| rs509334   | 11 | 120783128 | 0.18 | 0.06 | 0.27 | 0.29 |
| rs527709   | 11 | 105756724 | 0.11 | 0.04 | 0.14 | 0.09 |
| rs566552   | 11 | 108726089 | 0.09 | 0.11 | 0.15 | 0.12 |
| rs585555   | 11 | 94053391  | 0.13 | 0.10 | 0.43 | 0.41 |
| rs598264   | 11 | 30751301  | 0.00 | 0.38 | NA   | 0.01 |
| rs603295   | 11 | 78308496  | 0.05 | 0.12 | NA   | NA   |
| rs647756   | 11 | 107040968 | 0.04 | 0.33 | 0.44 | 0.39 |
| rs647975   | 11 | 117543951 | 0.02 | 0.25 | 0.15 | 0.03 |
| rs6486270  | 11 | 15927515  | 0.08 | 0.22 | 0.40 | 0.37 |
| rs6589360  | 11 | 112555502 | 0.13 | 0.15 | 0.42 | 0.42 |
| rs6590705  | 11 | 132839732 | 0.03 | 0.21 | 0.18 | 0.11 |

|            |    |           |      |      |      |      |
|------------|----|-----------|------|------|------|------|
| rs6592183  | 11 | 83841203  | 0.10 | 0.11 | 0.08 | 0.09 |
| rs680273   | 11 | 64296211  | 0.09 | 0.10 | 0.36 | 0.38 |
| rs7103088  | 11 | 129514516 | 0.08 | 0.04 | 0.32 | 0.32 |
| rs7125582  | 11 | 96053431  | 0.10 | 0.18 | 0.30 | 0.30 |
| rs7934726  | 11 | 113415486 | 0.03 | 0.13 | 0.26 | 0.19 |
| rs7935419  | 11 | 668973    | 0.12 | 0.33 | 0.18 | 0.17 |
| rs7952397  | 11 | 122562351 | 0.03 | 0.22 | 0.11 | 0.13 |
| rs7138514  | 12 | 78318689  | 0.00 | 0.10 | 0.13 | 0.21 |
| rs10744614 | 12 | 3425163   | 0.09 | 0.13 | NA   | 0.23 |
| rs10859541 | 12 | 92534318  | 0.04 | 0.26 | NA   | 0.27 |
| rs1402317  | 12 | 76753496  | 0.11 | 0.10 | 0.46 | 0.49 |
| rs1549338  | 12 | 114646999 | 0.20 | 0.15 | 0.40 | 0.31 |
| rs1560545  | 12 | 126870218 | 0.15 | 0.13 | 0.34 | 0.26 |
| rs1861482  | 12 | 11724925  | 0.12 | 0.12 | NA   | 0.22 |
| rs2615667  | 12 | 124569401 | 0.13 | 0.18 | 0.18 | 0.24 |
| rs3782711  | 12 | 6053442   | 0.09 | 0.18 | 0.18 | 0.28 |
| rs460406   | 12 | 71298182  | 0.20 | 0.08 | 0.48 | 0.44 |
| rs4767252  | 12 | 113672107 | 0.27 | 0.10 | 0.16 | 0.24 |
| rs4931655  | 12 | 32949329  | 0.06 | 0.13 | 0.18 | 0.22 |
| rs7306523  | 12 | 51680231  | 0.14 | 0.03 | NA   | NA   |
| rs7967165  | 12 | 950268    | 0.22 | 0.07 | 0.49 | 0.43 |
| rs7975017  | 12 | 26320060  | 0.17 | 0.08 | 0.19 | 0.20 |
| rs899653   | 12 | 56170068  | 0.11 | 0.13 | 0.11 | 0.33 |
| rs10876851 | 12 | 54471828  | NA   | 0.16 | 0.19 | 0.23 |
| rs12304312 | 12 | 125415094 | 0.00 | 0.29 | 0.09 | 0.18 |
| rs916682   | 12 | 110183529 | 0.25 | 0.04 | 0.31 | 0.27 |
| rs1051431  | 12 | 122211756 | 0.21 | 0.03 | NA   | NA   |
| rs1070544  | 12 | 123742318 | 0.03 | 0.17 | 0.25 | 0.32 |
| rs10772518 | 12 | 12017303  | 0.09 | 0.18 | 0.27 | 0.26 |
| rs10778691 | 12 | 78744019  | 0.08 | 0.03 | 0.22 | 0.22 |
| rs10784930 | 12 | 70374571  | 0.21 | 0.06 | 0.14 | 0.22 |
| rs10840686 | 12 | 8152917   | 0.29 | 0.13 | NA   | 0.44 |
| rs10841722 | 12 | 21057358  | 0.08 | 0.09 | 0.19 | 0.17 |
| rs10845099 | 12 | 10312069  | 0.08 | 0.17 | 0.38 | 0.44 |
| rs10878561 | 12 | 65791320  | 0.18 | 0.05 | 0.09 | 0.11 |
| rs11063488 | 12 | 5057090   | 0.35 | 0.16 | NA   | 0.40 |
| rs11064432 | 12 | 6839002   | 0.04 | 0.07 | NA   | 0.31 |
| rs11066430 | 12 | 111753980 | 0.05 | 0.31 | 0.01 | 0.02 |
| rs11110411 | 12 | 99442611  | 0.01 | 0.37 | NA   | 0.46 |
| rs11115459 | 12 | 81768245  | 0.03 | 0.09 | NA   | NA   |
| rs11171526 | 12 | 54192728  | 0.04 | 0.22 | 0.08 | 0.14 |
| rs11175885 | 12 | 64400897  | 0.09 | 0.15 | 0.27 | 0.29 |
| rs11182432 | 12 | 42855115  | 0.08 | 0.24 | 0.11 | 0.17 |
| rs11835531 | 12 | 131087534 | 0.14 | 0.13 | 0.15 | 0.13 |
| rs12370733 | 12 | 126421324 | 0.03 | 0.28 | 0.49 | 0.46 |
| rs124440   | 12 | 202923    | 0.13 | 0.27 | 0.36 | 0.49 |
| rs12820008 | 12 | 101676159 | 0.19 | 0.07 | 0.40 | 0.28 |
| rs1486638  | 12 | 128151364 | 0.01 | 0.43 | 0.14 | 0.23 |

|           |    |           |      |      |      |      |
|-----------|----|-----------|------|------|------|------|
| rs1612581 | 12 | 30352893  | 0.17 | 0.10 | 0.34 | 0.27 |
| rs1709704 | 12 | 127386467 | 0.00 | 0.23 | 0.03 | 0.06 |
| rs2242138 | 12 | 100273035 | 0.00 | 0.33 | 0.36 | 0.44 |
| rs2471601 | 12 | 45234926  | 0.08 | 0.12 | NA   | 0.43 |
| rs2731232 | 12 | 89098242  | 0.08 | 0.04 | 0.44 | 0.46 |
| rs280591  | 12 | 118775101 | 0.01 | 0.28 | NA   | 0.15 |
| rs388693  | 12 | 87696843  | 0.08 | 0.10 | 0.09 | 0.19 |
| rs4077055 | 12 | 120038806 | 0.08 | 0.25 | NA   | NA   |
| rs4350408 | 12 | 22043980  | 0.05 | 0.19 | 0.00 | 0.01 |
| rs4514479 | 12 | 23300566  | 0.21 | 0.07 | 0.34 | 0.27 |
| rs4759479 | 12 | 129541026 | 0.00 | 0.37 | 0.00 | 0.02 |
| rs4767461 | 12 | 115771364 | 0.27 | 0.01 | 0.48 | 0.49 |
| rs615382  | 12 | 48699178  | 0.05 | 0.14 | 0.11 | 0.08 |
| rs628644  | 12 | 116589307 | 0.31 | 0.01 | 0.42 | 0.38 |
| rs6486783 | 12 | 120858205 | 0.03 | 0.32 | NA   | 0.19 |
| rs6539244 | 12 | 104875232 | 0.02 | 0.20 | 0.08 | 0.14 |
| rs7132009 | 12 | 58873307  | 0.03 | 0.27 | 0.09 | 0.07 |
| rs7303229 | 12 | 5540711   | 0.24 | 0.11 | NA   | 0.38 |
| rs7307747 | 12 | 25389896  | 0.09 | 0.16 | NA   | 0.14 |
| rs7310891 | 12 | 14707830  | 0.01 | 0.26 | NA   | 0.00 |
| rs7397250 | 12 | 130615744 | 0.15 | 0.07 | NA   | 0.42 |
| rs7963493 | 12 | 26526342  | 0.20 | 0.13 | NA   | 0.46 |
| rs7967366 | 12 | 19079208  | 0.13 | 0.14 | NA   | NA   |
| rs7967984 | 12 | 74600665  | 0.31 | 0.03 | 0.15 | 0.31 |
| rs7969190 | 12 | 115455075 | 0.07 | 0.26 | 0.33 | 0.24 |
| rs7970314 | 12 | 46594441  | 0.22 | 0.01 | NA   | 0.38 |
| rs7978988 | 12 | 34288146  | 0.01 | 0.10 | 0.00 | 0.00 |
| rs850918  | 12 | 13033441  | 0.11 | 0.26 | 0.00 | 0.02 |
| rs918003  | 12 | 66562762  | 0.19 | 0.17 | 0.42 | 0.40 |
| rs984303  | 12 | 15641658  | 0.00 | 0.20 | 0.06 | 0.06 |
| rs987531  | 13 | 100203984 | 0.23 | 0.16 | 0.32 | 0.20 |
| rs1183183 | 13 | 110934706 | 0.14 | 0.06 | NA   | 0.35 |
| rs1329667 | 13 | 33389838  | 0.18 | 0.09 | 0.39 | 0.48 |
| rs1572018 | 13 | 40613282  | 0.14 | 0.01 | 0.47 | 0.41 |
| rs1622710 | 13 | 59004926  | 0.05 | 0.17 | 0.21 | 0.14 |
| rs1885894 | 13 | 21545183  | 0.23 | 0.08 | 0.27 | 0.39 |
| rs3751380 | 13 | 48049420  | 0.02 | 0.18 | 0.13 | 0.10 |
| rs7321057 | 13 | 50580015  | 0.10 | 0.18 | 0.49 | 0.32 |
| rs7333151 | 13 | 72517230  | 0.08 | 0.21 | 0.01 | 0.02 |
| rs943724  | 13 | 26172270  | 0.19 | 0.10 | NA   | 0.46 |
| rs9510171 | 13 | 21858130  | 0.08 | 0.06 | 0.20 | 0.31 |
| rs9522149 | 13 | 110625168 | 0.23 | 0.03 | 0.00 | 0.01 |
| rs9530435 | 13 | 74891888  | 0.18 | 0.08 | 0.02 | 0.06 |
| rs9551445 | 13 | 18884472  | 0.04 | 0.23 | 0.04 | 0.02 |
| rs9575430 | 13 | 83379843  | 0.02 | 0.25 | NA   | 0.08 |
| rs9582807 | 13 | 103578174 | 0.07 | 0.13 | NA   | 0.26 |
| rs9788393 | 13 | 93042338  | 0.22 | 0.07 | NA   | 0.26 |
| rs1020228 | 13 | 66274348  | 0.00 | 0.33 | NA   | 0.00 |

|            |    |           |      |      |      |      |
|------------|----|-----------|------|------|------|------|
| rs10459349 | 13 | 26684384  | 0.03 | 0.28 | 0.05 | 0.06 |
| rs1078421  | 13 | 38577678  | 0.21 | 0.18 | 0.39 | 0.49 |
| rs11840893 | 13 | 104180092 | 0.01 | 0.03 | NA   | 0.08 |
| rs12100282 | 13 | 32351449  | 0.02 | 0.27 | 0.00 | 0.01 |
| rs1999884  | 13 | 105078603 | 0.10 | 0.13 | 0.00 | 0.04 |
| rs2476230  | 13 | 101380444 | 0.12 | 0.17 | NA   | 0.20 |
| rs285087   | 13 | 97543805  | 0.03 | 0.24 | 0.46 | 0.48 |
| rs3211416  | 13 | 114028356 | 0.41 | 0.07 | 0.26 | 0.35 |
| rs4378490  | 13 | 24810035  | 0.10 | 0.11 | NA   | 0.40 |
| rs4581589  | 13 | 63243106  | 0.01 | 0.25 | 0.08 | 0.05 |
| rs4630437  | 13 | 112998037 | 0.00 | 0.34 | 0.07 | 0.14 |
| rs4907499  | 13 | 111827429 | 0.06 | 0.23 | NA   | 0.02 |
| rs552157   | 13 | 90913783  | 0.18 | 0.17 | NA   | 0.36 |
| rs6491743  | 13 | 102859333 | 0.04 | 0.03 | NA   | 0.21 |
| rs7332661  | 13 | 80264252  | 0.17 | 0.11 | NA   | 0.07 |
| rs7338078  | 13 | 106289769 | 0.03 | 0.20 | NA   | 0.06 |
| rs7492028  | 13 | 96367097  | 0.08 | 0.15 | 0.02 | 0.01 |
| rs790325   | 13 | 56527759  | 0.08 | 0.23 | NA   | 0.17 |
| rs7981680  | 13 | 27791870  | 0.01 | 0.30 | 0.06 | 0.07 |
| rs7989360  | 13 | 109137998 | 0.00 | 0.26 | 0.00 | 0.00 |
| rs8002907  | 13 | 73685238  | 0.09 | 0.18 | 0.16 | 0.11 |
| rs913607   | 13 | 105708805 | 0.15 | 0.09 | 0.19 | 0.32 |
| rs9509008  | 13 | 19501778  | 0.12 | 0.17 | 0.33 | 0.11 |
| rs9515517  | 13 | 88498193  | 0.24 | 0.08 | NA   | 0.48 |
| rs9531159  | 13 | 35368336  | 0.07 | 0.23 | NA   | 0.15 |
| rs9532218  | 13 | 37858370  | 0.01 | 0.20 | 0.00 | 0.02 |
| rs9533771  | 13 | 43575599  | 0.09 | 0.12 | NA   | 0.14 |
| rs9579606  | 13 | 30041391  | 0.04 | 0.17 | 0.00 | 0.00 |
| rs1003229  | 14 | 97241370  | 0.18 | 0.07 | 0.18 | 0.06 |
| rs10142224 | 14 | 105079690 | 0.03 | 0.26 | 0.20 | 0.09 |
| rs1057804  | 14 | 51503805  | 0.07 | 0.26 | 0.41 | 0.50 |
| rs11159698 | 14 | 84835008  | 0.18 | 0.08 | 0.36 | 0.40 |
| rs1131877  | 14 | 102411802 | 0.22 | 0.07 | 0.39 | 0.33 |
| rs1474965  | 14 | 25946860  | 0.20 | 0.15 | 0.13 | 0.23 |
| rs1888344  | 14 | 53398432  | 0.13 | 0.19 | 0.36 | 0.41 |
| rs1956424  | 14 | 36601653  | 0.04 | 0.27 | NA   | 0.18 |
| rs2369049  | 14 | 95241604  | 0.09 | 0.17 | 0.03 | 0.09 |
| rs3784191  | 14 | 31993041  | 0.11 | 0.13 | 0.43 | 0.39 |
| rs3825663  | 14 | 89499502  | 0.05 | 0.13 | 0.06 | 0.03 |
| rs4982736  | 14 | 22698306  | 0.14 | 0.13 | 0.36 | 0.33 |
| rs6572731  | 14 | 22307675  | 0.19 | 0.16 | 0.17 | 0.26 |
| rs7143380  | 14 | 55503022  | 0.02 | 0.24 | NA   | 0.02 |
| rs8022613  | 14 | 23476758  | 0.09 | 0.14 | 0.10 | 0.13 |
| rs8015314  | 14 | 94508981  | 0.15 | 0.36 | NA   | 0.12 |
| rs1009799  | 14 | 86995711  | 0.27 | 0.10 | 0.28 | 0.18 |
| rs1012023  | 14 | 33025960  | 0.03 | 0.11 | NA   | 0.43 |
| rs1012913  | 14 | 36014397  | 0.02 | 0.27 | NA   | 0.01 |
| rs11156730 | 14 | 20407106  | 0.13 | 0.14 | NA   | 0.33 |

|            |    |           |      |      |      |      |
|------------|----|-----------|------|------|------|------|
| rs1191022  | 14 | 99515059  | 0.20 | 0.15 | 0.48 | 0.43 |
| rs12589619 | 14 | 104117773 | 0.08 | 0.15 | 0.28 | 0.23 |
| rs12891015 | 14 | 33911450  | 0.17 | 0.08 | 0.48 | 0.42 |
| rs12897140 | 14 | 61031163  | 0.12 | 0.12 | NA   | 0.46 |
| rs12897779 | 14 | 31254168  | 0.13 | 0.06 | 0.00 | 0.01 |
| rs1384631  | 14 | 84357757  | 0.12 | 0.12 | NA   | 0.02 |
| rs1620265  | 14 | 20092673  | 0.02 | 0.25 | 0.00 | 0.00 |
| rs17112080 | 14 | 106303947 | 0.00 | 0.31 | 0.00 | 0.00 |
| rs17115651 | 14 | 44385429  | 0.08 | 0.24 | 0.10 | 0.10 |
| rs1953233  | 14 | 64642915  | 0.03 | 0.23 | 0.33 | 0.26 |
| rs1954231  | 14 | 46497850  | 0.21 | 0.13 | NA   | 0.18 |
| rs2332880  | 14 | 26494304  | 0.28 | 0.11 | NA   | 0.26 |
| rs2356515  | 14 | 62917974  | 0.10 | 0.10 | 0.44 | 0.41 |
| rs4899321  | 14 | 69431901  | 0.11 | 0.11 | 0.16 | 0.07 |
| rs6574072  | 14 | 71937086  | 0.11 | 0.12 | 0.42 | 0.46 |
| rs6575264  | 14 | 92054866  | 0.00 | 0.35 | 0.00 | 0.00 |
| rs7141800  | 14 | 88874260  | 0.11 | 0.15 | 0.09 | 0.08 |
| rs7146139  | 14 | 50320907  | 0.03 | 0.25 | NA   | 0.00 |
| rs7157792  | 14 | 76422856  | 0.01 | 0.18 | NA   | 0.13 |
| rs8009244  | 14 | 54713505  | 0.08 | 0.14 | 0.30 | 0.21 |
| rs8013195  | 14 | 90310700  | 0.08 | 0.22 | 0.35 | 0.22 |
| rs8015766  | 14 | 25047610  | 0.00 | 0.28 | 0.08 | 0.09 |
| rs8019850  | 14 | 56755187  | 0.09 | 0.08 | NA   | 0.08 |
| rs8022535  | 14 | 75131136  | 0.24 | 0.02 | 0.31 | 0.23 |
| rs8022629  | 14 | 94004861  | 0.02 | 0.27 | 0.22 | 0.33 |
| rs9323995  | 14 | 98240492  | 0.00 | 0.39 | 0.00 | 0.00 |
| rs987644   | 14 | 78313798  | 0.19 | 0.01 | 0.31 | 0.40 |
| rs2144061  | 14 | 66596315  | 0.13 | 0.30 | 0.50 | 0.42 |
| rs1448484  | 15 | 25957036  | 0.00 | 0.13 | NA   | 0.00 |
| rs1479828  | 15 | 92417738  | 0.26 | 0.16 | 0.42 | 0.32 |
| rs1873813  | 15 | 51082540  | 0.18 | 0.09 | 0.39 | 0.40 |
| rs3844110  | 15 | 88315951  | 0.07 | 0.18 | NA   | 0.00 |
| rs4777126  | 15 | 67294514  | 0.10 | 0.14 | 0.30 | 0.28 |
| rs4965117  | 15 | 96293254  | 0.27 | 0.02 | 0.22 | 0.37 |
| rs4965814  | 15 | 99631440  | 0.13 | 0.08 | 0.43 | 0.39 |
| rs6495489  | 15 | 78409622  | 0.27 | 0.04 | 0.27 | 0.31 |
| rs6496858  | 15 | 90062853  | 0.15 | 0.02 | 0.49 | 0.41 |
| rs6576431  | 15 | 21333294  | 0.00 | 0.30 | 0.00 | 0.00 |
| rs6606825  | 15 | 20614243  | 0.14 | 0.08 | 0.36 | 0.44 |
| rs7173247  | 15 | 31246185  | 0.13 | 0.18 | 0.27 | 0.32 |
| rs7402884  | 15 | 75169014  | 0.09 | 0.15 | 0.34 | 0.49 |
| rs8033972  | 15 | 62312033  | 0.19 | 0.00 | 0.16 | 0.16 |
| rs8040248  | 15 | 82519409  | 0.10 | 0.17 | 0.38 | 0.38 |
| rs8042276  | 15 | 25367670  | 0.14 | 0.03 | 0.43 | 0.43 |
| rs957703   | 15 | 93610134  | 0.24 | 0.06 | 0.13 | 0.13 |
| rs974828   | 15 | 58642847  | 0.05 | 0.03 | 0.24 | 0.16 |
| rs4238528  | 15 | 79406760  | 0.23 | 0.11 | 0.39 | 0.33 |
| rs1037575  | 15 | 33527874  | 0.18 | 0.01 | 0.16 | 0.23 |

|            |    |          |      |      |      |      |
|------------|----|----------|------|------|------|------|
| rs11070208 | 15 | 27102607 | 0.09 | 0.07 | NA   | NA   |
| rs11071682 | 15 | 60740506 | 0.06 | 0.19 | 0.04 | 0.03 |
| rs11630692 | 15 | 90791157 | 0.10 | 0.20 | NA   | 0.02 |
| rs12898974 | 15 | 91786673 | 0.17 | 0.15 | 0.17 | 0.37 |
| rs1376785  | 15 | 32900002 | 0.09 | 0.10 | NA   | 0.27 |
| rs16977374 | 15 | 55368884 | 0.18 | 0.09 | 0.42 | 0.39 |
| rs1905233  | 15 | 79630386 | 0.11 | 0.18 | 0.35 | 0.24 |
| rs199138   | 15 | 43174842 | 0.02 | 0.01 | 0.07 | 0.06 |
| rs2004657  | 15 | 27421806 | 0.27 | 0.06 | NA   | 0.40 |
| rs2063275  | 15 | 97411591 | 0.03 | 0.18 | NA   | 0.02 |
| rs2581468  | 15 | 97929991 | 0.19 | 0.10 | 0.15 | 0.39 |
| rs2622530  | 15 | 98390477 | 0.01 | 0.23 | 0.00 | 0.07 |
| rs2675345  | 15 | 46187491 | 0.00 | 0.03 | NA   | 0.23 |
| rs2719890  | 15 | 23070055 | 0.03 | 0.13 | 0.02 | 0.03 |
| rs275187   | 15 | 37215985 | 0.08 | 0.16 | 0.10 | 0.18 |
| rs2859553  | 15 | 85301162 | 0.19 | 0.16 | NA   | 0.29 |
| rs3087652  | 15 | 70422957 | 0.03 | 0.13 | 0.41 | 0.17 |
| rs480616   | 15 | 32057267 | 0.05 | 0.07 | NA   | 0.09 |
| rs6576551  | 15 | 24027268 | 0.16 | 0.08 | 0.13 | 0.26 |
| rs7162991  | 15 | 66419366 | 0.06 | 0.43 | 0.06 | 0.09 |
| rs7175787  | 15 | 99216323 | 0.01 | 0.18 | 0.11 | 0.01 |
| rs7402101  | 15 | 69841884 | 0.02 | 0.14 | 0.29 | 0.19 |
| rs8035530  | 15 | 36084358 | 0.02 | 0.21 | 0.12 | 0.16 |
| rs896999   | 15 | 66887631 | 0.03 | 0.24 | 0.23 | 0.24 |
| rs977681   | 15 | 89583263 | 0.16 | 0.07 | NA   | 0.20 |
| rs7170666  | 15 | 86955970 | 0.03 | 0.22 | NA   | 0.42 |
| rs11074742 | 16 | 10335148 | 0.08 | 0.11 | 0.08 | 0.12 |
| rs13335375 | 16 | 15926090 | 0.08 | 0.14 | 0.09 | 0.02 |
| rs1503949  | 16 | 22866185 | 0.13 | 0.11 | 0.08 | 0.13 |
| rs1848175  | 16 | 49618907 | 0.13 | 0.13 | 0.18 | 0.19 |
| rs2562182  | 16 | 73946    | 0.13 | 0.23 | 0.34 | 0.34 |
| rs3843712  | 16 | 65491654 | 0.15 | 0.16 | 0.13 | 0.23 |
| rs3912519  | 16 | 50440889 | 0.14 | 0.16 | 0.35 | 0.22 |
| rs3922878  | 16 | 85412205 | 0.06 | 0.30 | 0.42 | 0.36 |
| rs4280248  | 16 | 84619550 | 0.15 | 0.08 | 0.34 | 0.34 |
| rs4784375  | 16 | 52953863 | 0.14 | 0.08 | 0.43 | 0.47 |
| rs6500552  | 16 | 3699394  | 0.20 | 0.05 | 0.29 | 0.34 |
| rs7203982  | 16 | 28862361 | 0.03 | 0.32 | 0.21 | 0.27 |
| rs7204918  | 16 | 12823080 | 0.12 | 0.05 | 0.24 | 0.33 |
| rs8045868  | 16 | 24872019 | 0.00 | 0.23 | 0.01 | 0.02 |
| rs8046826  | 16 | 46730882 | 0.24 | 0.09 | 0.07 | 0.18 |
| rs9923225  | 16 | 77471501 | 0.18 | 0.14 | 0.36 | 0.41 |
| rs9927150  | 16 | 764099   | 0.23 | 0.12 | 0.40 | 0.32 |
| rs9928718  | 16 | 73634239 | 0.08 | 0.19 | 0.15 | 0.24 |
| rs10775349 | 16 | 4019824  | 0.11 | 0.08 | 0.08 | 0.11 |
| rs11077228 | 16 | 7797996  | 0.22 | 0.05 | 0.28 | 0.39 |
| rs1110471  | 16 | 64908094 | 0.12 | 0.02 | 0.10 | 0.13 |
| rs12149023 | 16 | 9561854  | 0.09 | 0.14 | 0.03 | 0.07 |

|            |    |          |      |      |      |      |
|------------|----|----------|------|------|------|------|
| rs12444204 | 16 | 72040453 | 0.21 | 0.07 | 0.36 | 0.36 |
| rs1423076  | 16 | 26435032 | 0.13 | 0.11 | 0.38 | 0.23 |
| rs1528322  | 16 | 5343986  | 0.03 | 0.21 | 0.00 | 0.01 |
| rs1557519  | 16 | 14158804 | 0.11 | 0.09 | 0.37 | 0.28 |
| rs1728390  | 16 | 84971560 | 0.08 | 0.15 | 0.47 | 0.48 |
| rs1787785  | 16 | 55899882 | 0.16 | 0.13 | 0.25 | 0.17 |
| rs4278742  | 16 | 80959798 | 0.15 | 0.14 | 0.32 | 0.20 |
| rs4516239  | 16 | 77004103 | 0.02 | 0.08 | 0.25 | 0.33 |
| rs4782812  | 16 | 82121112 | 0.05 | 0.08 | 0.10 | 0.25 |
| rs4783432  | 16 | 21858916 | 0.18 | 0.03 | 0.25 | 0.24 |
| rs4785155  | 16 | 47561279 | 0.12 | 0.18 | 0.45 | 0.47 |
| rs4787040  | 16 | 7500981  | 0.20 | 0.01 | 0.07 | 0.10 |
| rs4843607  | 16 | 85993724 | 0.03 | 0.17 | 0.00 | 0.00 |
| rs4889024  | 16 | 78353697 | 0.17 | 0.06 | 0.27 | 0.20 |
| rs6498910  | 16 | 62219139 | 0.12 | 0.18 | 0.38 | 0.44 |
| rs6499886  | 16 | 56171159 | 0.31 | 0.03 | 0.19 | 0.24 |
| rs6500465  | 16 | 88680668 | 0.16 | 0.13 | 0.30 | 0.16 |
| rs6564771  | 16 | 79199290 | 0.14 | 0.14 | 0.43 | 0.27 |
| rs7187018  | 16 | 17107926 | 0.02 | 0.29 | 0.04 | 0.06 |
| rs7198976  | 16 | 58487027 | 0.07 | 0.26 | 0.50 | 0.24 |
| rs7201030  | 16 | 75081293 | 0.12 | 0.04 | 0.14 | 0.19 |
| rs739564   | 16 | 19647738 | 0.18 | 0.18 | 0.22 | 0.14 |
| rs8053934  | 16 | 82576092 | 0.12 | 0.10 | 0.11 | 0.19 |
| rs8061597  | 16 | 6245103  | 0.14 | 0.09 | 0.21 | 0.18 |
| rs8062916  | 16 | 87908215 | 0.00 | 0.38 | 0.00 | 0.00 |
| rs9925564  | 16 | 9136557  | 0.01 | 0.13 | 0.03 | 0.07 |
| rs9925755  | 16 | 59426530 | 0.08 | 0.29 | 0.29 | 0.26 |
| rs9933207  | 16 | 80588778 | 0.00 | 0.30 | 0.01 | 0.01 |
| rs9934908  | 16 | 50234093 | 0.24 | 0.12 | 0.17 | 0.23 |
| rs12933048 | 16 | 5634379  | 0.03 | 0.29 | 0.00 | 0.00 |
| rs1107704  | 17 | 70020020 | 0.11 | 0.05 | 0.36 | 0.30 |
| rs1427463  | 17 | 59923044 | 0.08 | 0.19 | 0.04 | 0.02 |
| rs212498   | 17 | 29755162 | 0.31 | 0.07 | 0.08 | 0.10 |
| rs2593595  | 17 | 38309771 | 0.20 | 0.01 | 0.10 | 0.17 |
| rs2904210  | 17 | 60833655 | 0.11 | 0.09 | 0.43 | 0.47 |
| rs4924980  | 17 | 19145456 | 0.20 | 0.02 | 0.00 | 0.00 |
| rs6607358  | 17 | 32389367 | 0.05 | 0.15 | 0.00 | 0.00 |
| rs719934   | 17 | 62430855 | 0.05 | 0.26 | 0.31 | 0.22 |
| rs7208188  | 17 | 113034   | 0.11 | 0.10 | 0.23 | 0.29 |
| rs7223820  | 17 | 17211843 | 0.16 | 0.06 | 0.00 | 0.03 |
| rs7226263  | 17 | 42170068 | 0.02 | 0.25 | NA   | 0.36 |
| rs758857   | 17 | 15794982 | 0.17 | 0.18 | 0.37 | 0.32 |
| rs8070402  | 17 | 2313041  | 0.00 | 0.38 | 0.00 | 0.00 |
| rs8070464  | 17 | 4459241  | 0.12 | 0.22 | 0.32 | 0.32 |
| rs8074370  | 17 | 74468926 | 0.13 | 0.19 | 0.27 | 0.26 |
| rs8077384  | 17 | 63674826 | 0.10 | 0.13 | 0.36 | 0.31 |
| rs894685   | 17 | 40410565 | 0.28 | 0.00 | 0.28 | 0.30 |
| rs903104   | 17 | 68536297 | 0.18 | 0.29 | 0.14 | 0.23 |



|            |    |          |      |      |      |      |
|------------|----|----------|------|------|------|------|
| rs9896656  | 17 | 69286243 | 0.11 | 0.14 | 0.26 | 0.17 |
| rs9899687  | 17 | 70869854 | 0.11 | 0.04 | 0.05 | 0.07 |
| rs1019117  | 17 | 52103128 | 0.07 | 0.27 | 0.05 | 0.03 |
| rs11651869 | 17 | 46256936 | 0.21 | 0.09 | 0.49 | 0.30 |
| rs16977110 | 17 | 67659465 | 0.03 | 0.27 | 0.17 | 0.13 |
| rs1910211  | 17 | 48878079 | 0.10 | 0.08 | NA   | 0.00 |
| rs2287499  | 17 | 7532893  | 0.16 | 0.08 | 0.24 | 0.32 |
| rs237303   | 17 | 12376639 | 0.17 | 0.12 | 0.47 | 0.44 |
| rs2430522  | 17 | 67204284 | 0.03 | 0.31 | 0.12 | 0.13 |
| rs2735484  | 17 | 31358760 | 0.19 | 0.05 | 0.43 | 0.48 |
| rs2958458  | 17 | 20655970 | 0.13 | 0.04 | 0.49 | 0.44 |
| rs3760281  | 17 | 51157210 | 0.13 | 0.07 | 0.30 | 0.31 |
| rs4790359  | 17 | 2578735  | 0.00 | 0.12 | 0.00 | 0.00 |
| rs4792286  | 17 | 12684478 | 0.13 | 0.14 | 0.33 | 0.34 |
| rs4969421  | 17 | 76925231 | 0.32 | 0.06 | 0.28 | 0.42 |
| rs4969485  | 17 | 77624969 | 0.01 | 0.38 | 0.15 | 0.20 |
| rs6505324  | 17 | 28354977 | 0.17 | 0.14 | 0.02 | 0.04 |
| rs7214631  | 17 | 55947947 | 0.01 | 0.15 | 0.00 | 0.00 |
| rs7218173  | 17 | 73184071 | 0.08 | 0.21 | 0.19 | 0.12 |
| rs7222177  | 17 | 29368497 | 0.03 | 0.27 | 0.00 | 0.02 |
| rs739753   | 17 | 33118390 | 0.11 | 0.08 | 0.40 | 0.36 |
| rs771722   | 17 | 72394995 | 0.26 | 0.01 | 0.33 | 0.49 |
| rs8073752  | 17 | 11615619 | 0.12 | 0.26 | NA   | 0.29 |
| rs8075550  | 17 | 10967784 | 0.02 | 0.19 | 0.25 | 0.20 |
| rs8079412  | 17 | 26301240 | 0.01 | 0.13 | 0.00 | 0.01 |
| rs8080590  | 17 | 14171999 | 0.10 | 0.22 | NA   | 0.31 |
| rs884379   | 17 | 52758342 | 0.12 | 0.09 | 0.34 | 0.26 |
| rs11082588 | 18 | 43244969 | 0.16 | 0.07 | 0.23 | 0.35 |
| rs1367345  | 18 | 69633470 | 0.22 | 0.07 | 0.39 | 0.42 |
| rs1877415  | 18 | 44303255 | 0.18 | 0.09 | NA   | NA   |
| rs2155771  | 18 | 24818125 | 0.11 | 0.09 | 0.11 | 0.18 |
| rs4377248  | 18 | 60013901 | 0.07 | 0.21 | 0.21 | 0.11 |
| rs4436849  | 18 | 28809444 | 0.00 | 0.13 | 0.09 | 0.06 |
| rs4797155  | 18 | 4251884  | 0.16 | 0.11 | 0.25 | 0.23 |
| rs4798954  | 18 | 73939290 | 0.33 | 0.07 | 0.46 | 0.47 |
| rs483346   | 18 | 74817865 | 0.03 | 0.32 | 0.00 | 0.01 |
| rs4891724  | 18 | 64961189 | 0.06 | 0.13 | 0.36 | 0.40 |
| rs550139   | 18 | 30978322 | 0.23 | 0.17 | 0.44 | 0.48 |
| rs590218   | 18 | 72198871 | 0.08 | 0.24 | 0.16 | 0.19 |
| rs629699   | 18 | 8825869  | 0.27 | 0.10 | 0.15 | 0.17 |
| rs634392   | 18 | 68367025 | 0.05 | 0.26 | 0.38 | 0.38 |
| rs647853   | 18 | 38442742 | 0.18 | 0.03 | NA   | 0.29 |
| rs874299   | 18 | 73185272 | 0.29 | 0.03 | 0.33 | 0.33 |
| rs9320033  | 18 | 59735962 | 0.22 | 0.20 | 0.36 | 0.48 |
| rs9945724  | 18 | 44694487 | 0.05 | 0.20 | 0.16 | 0.19 |
| rs12960708 | 18 | 25692301 | 0.31 | 0.11 | 0.36 | 0.34 |
| rs16976596 | 18 | 11686613 | 0.12 | 0.19 | 0.06 | 0.03 |
| rs17061875 | 18 | 61973673 | 0.05 | 0.26 | 0.30 | 0.31 |

|            |    |          |      |      |      |      |
|------------|----|----------|------|------|------|------|
| rs1893223  | 18 | 7599137  | 0.13 | 0.06 | 0.29 | 0.24 |
| rs1942920  | 18 | 55790389 | 0.05 | 0.13 | 0.19 | 0.08 |
| rs2156103  | 18 | 68626876 | 0.01 | 0.14 | 0.30 | 0.20 |
| rs2874686  | 18 | 5397839  | 0.04 | 0.09 | 0.13 | 0.08 |
| rs307114   | 18 | 35894645 | 0.15 | 0.03 | NA   | 0.44 |
| rs3764962  | 18 | 18017009 | 0.01 | 0.20 | 0.02 | 0.07 |
| rs439890   | 18 | 3710081  | 0.07 | 0.14 | 0.10 | 0.16 |
| rs456908   | 18 | 11308729 | 0.21 | 0.14 | 0.12 | 0.18 |
| rs4798924  | 18 | 75734727 | 0.03 | 0.24 | 0.24 | 0.13 |
| rs4891384  | 18 | 65775534 | 0.03 | 0.06 | 0.00 | 0.00 |
| rs529067   | 18 | 50107039 | 0.08 | 0.25 | 0.01 | 0.01 |
| rs545056   | 18 | 10555281 | 0.05 | 0.28 | 0.29 | 0.22 |
| rs568273   | 18 | 600157   | 0.00 | 0.32 | 0.00 | 0.00 |
| rs571324   | 18 | 7035121  | 0.01 | 0.19 | 0.16 | 0.21 |
| rs6506123  | 18 | 3412508  | 0.01 | 0.26 | 0.00 | 0.00 |
| rs650754   | 18 | 36803731 | 0.16 | 0.07 | 0.50 | 0.40 |
| rs6508087  | 18 | 47551726 | 0.17 | 0.12 | 0.29 | 0.47 |
| rs684289   | 18 | 39220883 | 0.21 | 0.16 | 0.32 | 0.39 |
| rs7235479  | 18 | 2453095  | 0.02 | 0.14 | 0.10 | 0.17 |
| rs7243722  | 18 | 19997389 | 0.06 | 0.14 | 0.43 | 0.40 |
| rs758811   | 18 | 57154484 | 0.09 | 0.24 | 0.06 | 0.07 |
| rs897351   | 18 | 6092146  | 0.18 | 0.00 | 0.04 | 0.08 |
| rs898487   | 18 | 71628874 | 0.01 | 0.24 | 0.02 | 0.01 |
| rs2586204  | 18 | 17228736 | 0.18 | NA   | NA   | NA   |
| rs10553    | 19 | 37779881 | 0.01 | 0.20 | 0.36 | 0.48 |
| rs1865028  | 19 | 5966066  | 0.01 | 0.25 | 0.05 | 0.08 |
| rs2052474  | 19 | 11517995 | 0.08 | 0.21 | 0.06 | 0.16 |
| rs2231738  | 19 | 45141888 | 0.09 | 0.13 | 0.19 | 0.28 |
| rs2285972  | 19 | 1309726  | 0.31 | 0.03 | 0.37 | 0.39 |
| rs2607276  | 19 | 13815633 | 0.20 | 0.10 | 0.38 | 0.27 |
| rs3745099  | 19 | 57593717 | 0.10 | 0.08 | 0.40 | 0.37 |
| rs3810168  | 19 | 60588521 | 0.09 | 0.13 | 0.09 | 0.14 |
| rs6510761  | 19 | 3516909  | 0.06 | 0.07 | 0.05 | 0.08 |
| rs6511061  | 19 | 19915823 | 0.05 | 0.16 | 0.25 | 0.23 |
| rs7259371  | 19 | 38226481 | 0.18 | 0.23 | NA   | 0.47 |
| rs8106856  | 19 | 6322798  | 0.13 | 0.09 | 0.38 | 0.41 |
| rs8113531  | 19 | 9104893  | 0.00 | 0.29 | 0.09 | 0.03 |
| rs867815   | 19 | 34225922 | 0.14 | 0.09 | 0.28 | 0.48 |
| rs890869   | 19 | 60324855 | 0.13 | 0.10 | 0.34 | 0.48 |
| rs10401786 | 19 | 7766764  | 0.03 | 0.30 | 0.00 | 0.00 |
| rs10405317 | 19 | 1642725  | 0.19 | 0.14 | 0.49 | 0.50 |
| rs11673628 | 19 | 61314878 | 0.09 | 0.14 | 0.39 | 0.29 |
| rs1205817  | 19 | 47295616 | 0.16 | 0.08 | 0.17 | 0.14 |
| rs12972417 | 19 | 17386314 | 0.16 | 0.19 | 0.38 | 0.40 |
| rs1345656  | 19 | 40072184 | 0.37 | 0.03 | NA   | 0.33 |
| rs1626153  | 19 | 56477836 | 0.03 | 0.21 | 0.15 | 0.24 |
| rs1650940  | 19 | 58199111 | 0.06 | 0.20 | NA   | 0.39 |
| rs1850930  | 19 | 21631302 | 0.29 | 0.08 | 0.40 | 0.24 |

|            |    |          |      |      |      |      |
|------------|----|----------|------|------|------|------|
| rs1879266  | 19 | 54681872 | 0.23 | 0.05 | 0.10 | 0.23 |
| rs2242143  | 19 | 16162544 | 0.28 | 0.02 | 0.47 | 0.38 |
| rs274883   | 19 | 53314357 | 0.22 | 0.08 | 0.29 | 0.31 |
| rs2900918  | 19 | 13366333 | 0.05 | 0.23 | 0.17 | 0.30 |
| rs2974190  | 19 | 52752878 | 0.03 | 0.20 | 0.07 | 0.04 |
| rs308197   | 19 | 6786440  | 0.18 | 0.10 | NA   | NA   |
| rs399878   | 19 | 11295505 | 0.06 | 0.22 | 0.16 | 0.13 |
| rs562638   | 19 | 44541629 | 0.15 | 0.17 | 0.15 | 0.10 |
| rs7252112  | 19 | 397887   | 0.04 | 0.33 | 0.38 | 0.36 |
| rs7255770  | 19 | 50531860 | 0.03 | 0.22 | 0.26 | 0.33 |
| rs8109437  | 19 | 63644139 | 0.00 | 0.27 | 0.00 | 0.00 |
| rs8112502  | 19 | 57315134 | 0.07 | 0.25 | 0.18 | 0.23 |
| rs846870   | 19 | 49778186 | 0.15 | 0.15 | 0.36 | 0.21 |
| rs901792   | 19 | 16652443 | 0.19 | 0.05 | 0.27 | 0.40 |
| rs2009609  | 19 | 62955811 | 0.00 | 0.30 | 0.05 | 0.01 |
| rs8110664  | 19 | 2834136  | 0.03 | NA   | 0.00 | 0.00 |
| rs1028546  | 20 | 53171407 | 0.13 | 0.08 | 0.17 | 0.11 |
| rs16984321 | 20 | 58809363 | 0.05 | 0.18 | NA   | 0.04 |
| rs16990309 | 20 | 4784440  | 0.13 | 0.27 | NA   | 0.14 |
| rs2294306  | 20 | 7817025  | 0.01 | 0.17 | NA   | 0.34 |
| rs2876410  | 20 | 15502753 | 0.25 | 0.03 | NA   | 0.40 |
| rs310644   | 20 | 61629948 | 0.12 | 0.08 | 0.00 | 0.04 |
| rs4811429  | 20 | 51458409 | 0.08 | 0.24 | 0.19 | 0.21 |
| rs6019272  | 20 | 46586614 | 0.01 | 0.27 | 0.19 | 0.23 |
| rs6101991  | 20 | 38515722 | 0.08 | 0.16 | 0.24 | 0.12 |
| rs914828   | 20 | 45050724 | 0.06 | 0.17 | 0.34 | 0.44 |
| rs2426641  | 20 | 54725667 | NA   | 0.05 | NA   | 0.36 |
| rs1182522  | 20 | 57799471 | 0.09 | 0.32 | 0.42 | 0.41 |
| rs1203915  | 20 | 22520504 | 0.03 | 0.27 | NA   | 0.19 |
| rs1318379  | 20 | 55194692 | 0.05 | 0.21 | NA   | 0.09 |
| rs1743488  | 20 | 23997674 | 0.17 | 0.05 | 0.25 | 0.19 |
| rs1821808  | 20 | 53979208 | 0.03 | 0.14 | NA   | 0.01 |
| rs1883488  | 20 | 9353752  | 0.03 | 0.27 | NA   | 0.26 |
| rs1883999  | 20 | 50643470 | 0.13 | 0.15 | NA   | 0.24 |
| rs2064949  | 20 | 19756654 | 0.13 | 0.13 | NA   | 0.23 |
| rs2077713  | 20 | 166783   | 0.09 | 0.24 | 0.19 | 0.23 |
| rs2151512  | 20 | 60346890 | 0.23 | 0.03 | 0.24 | 0.23 |
| rs2207102  | 20 | 11244026 | 0.03 | 0.18 | NA   | 0.04 |
| rs2426057  | 20 | 46001243 | 0.13 | 0.11 | 0.43 | 0.39 |
| rs2426515  | 20 | 52506124 | 0.16 | 0.00 | 0.13 | 0.13 |
| rs4911320  | 20 | 31377692 | 0.03 | 0.18 | NA   | 0.08 |
| rs554362   | 20 | 850002   | 0.02 | 0.18 | 0.00 | 0.00 |
| rs580897   | 20 | 58108837 | 0.08 | 0.09 | NA   | 0.37 |
| rs6015097  | 20 | 55856860 | 0.17 | 0.07 | NA   | 0.12 |
| rs6018424  | 20 | 45420391 | 0.22 | 0.09 | NA   | 0.22 |
| rs6029503  | 20 | 39053501 | 0.12 | 0.17 | 0.40 | 0.42 |
| rs6046024  | 20 | 19294184 | 0.02 | 0.23 | NA   | 0.38 |
| rs6051510  | 20 | 2910104  | 0.13 | 0.19 | NA   | 0.28 |

|            |    |          |      |      |      |      |
|------------|----|----------|------|------|------|------|
| rs6133313  | 20 | 6355326  | 0.02 | 0.23 | NA   | 0.00 |
| rs646814   | 20 | 12939536 | 0.16 | 0.13 | NA   | 0.11 |
| rs7263518  | 20 | 42263105 | 0.09 | 0.25 | NA   | 0.42 |
| rs730467   | 20 | 41334099 | 0.05 | 0.36 | NA   | 0.02 |
| rs1209914  | 21 | 39074242 | 0.25 | 0.03 | 0.43 | 0.46 |
| rs1487940  | 21 | 20525155 | 0.18 | 0.03 | 0.36 | 0.46 |
| rs2070398  | 21 | 29800235 | 0.23 | 0.06 | 0.35 | 0.36 |
| rs220245   | 21 | 42332241 | 0.15 | 0.18 | NA   | 0.31 |
| rs2832643  | 21 | 30450088 | 0.18 | 0.00 | 0.33 | 0.40 |
| rs2834670  | 21 | 35202246 | 0.19 | 0.03 | NA   | 0.42 |
| rs380417   | 21 | 26194030 | 0.23 | 0.16 | 0.31 | 0.46 |
| rs766850   | 21 | 41468687 | 0.20 | 0.07 | 0.09 | 0.16 |
| rs1689045  | 21 | 16525943 | 0.00 | 0.15 | 0.00 | 0.00 |
| rs2284473  | 21 | 31450991 | 0.01 | 0.35 | NA   | 0.26 |
| rs2823880  | 21 | 16850425 | 0.00 | 0.11 | 0.05 | 0.08 |
| rs2824687  | 21 | 18474680 | 0.10 | 0.03 | 0.21 | 0.17 |
| rs2833775  | 21 | 32634146 | 0.22 | 0.03 | 0.40 | 0.38 |
| rs2835367  | 21 | 36805244 | 0.08 | 0.14 | 0.38 | 0.42 |
| rs2836181  | 21 | 38477680 | 0.02 | 0.16 | 0.07 | 0.13 |
| rs369908   | 21 | 41689003 | 0.21 | 0.10 | 0.48 | 0.47 |
| rs605781   | 21 | 43558435 | 0.04 | 0.21 | 0.45 | 0.38 |
| rs718387   | 21 | 36049947 | 0.03 | 0.19 | 0.28 | 0.28 |
| rs9306171  | 21 | 44283206 | 0.17 | 0.08 | 0.34 | 0.24 |
| rs9977149  | 21 | 15936071 | 0.09 | 0.05 | 0.12 | 0.06 |
| rs9977512  | 21 | 24556659 | 0.06 | 0.11 | 0.11 | 0.10 |
| rs1013603  | 22 | 31982454 | 0.18 | 0.11 | 0.43 | 0.39 |
| rs11703808 | 22 | 30354980 | 0.36 | 0.07 | 0.15 | 0.18 |
| rs139676   | 22 | 23578765 | 0.23 | 0.00 | 0.32 | 0.36 |
| rs362249   | 22 | 16990110 | 0.21 | 0.05 | 0.42 | 0.43 |
| rs4417800  | 22 | 32293790 | 0.06 | 0.14 | 0.16 | 0.09 |
| rs4823209  | 22 | 42992777 | 0.05 | 0.23 | 0.49 | 0.48 |
| rs4824056  | 22 | 48314077 | 0.14 | 0.14 | 0.35 | 0.29 |
| rs6004919  | 22 | 24785216 | 0.12 | 0.15 | 0.17 | 0.21 |
| rs6007220  | 22 | 43405168 | 0.10 | 0.10 | NA   | 0.17 |
| rs6007573  | 22 | 44053778 | 0.05 | 0.18 | 0.33 | 0.37 |
| rs650276   | 22 | 25122236 | 0.23 | 0.02 | 0.33 | 0.31 |
| rs737796   | 22 | 20768050 | 0.13 | 0.14 | 0.38 | 0.28 |
| rs9618000  | 22 | 16233714 | 0.14 | 0.30 | 0.22 | 0.33 |
| rs1009787  | 22 | 17752784 | 0.04 | 0.35 | 0.22 | 0.18 |
| rs1028528  | 22 | 46740954 | 0.22 | 0.22 | 0.39 | 0.33 |
| rs12159761 | 22 | 37602587 | 0.01 | 0.14 | 0.00 | 0.00 |
| rs444763   | 22 | 19773283 | 0.29 | 0.08 | 0.32 | 0.33 |
| rs5999762  | 22 | 33929782 | 0.18 | 0.03 | NA   | 0.42 |
| rs6002476  | 22 | 40498827 | 0.03 | 0.22 | NA   | 0.02 |
| rs6004726  | 22 | 24363507 | 0.04 | 0.29 | 0.05 | 0.01 |
| rs6520141  | 22 | 48674349 | 0.09 | 0.16 | 0.14 | 0.09 |
| rs739200   | 22 | 34762283 | 0.10 | 0.14 | 0.08 | 0.07 |
| rs742022   | 22 | 47140426 | 0.21 | 0.23 | 0.43 | 0.42 |

|           |    |          |      |      |      |      |
|-----------|----|----------|------|------|------|------|
| rs743920  | 22 | 27951128 | 0.08 | 0.18 | 0.40 | 0.47 |
| rs8142477 | 22 | 49358242 | 0.07 | 0.26 | 0.42 | 0.48 |
| rs932327  | 22 | 36235119 | 0.14 | 0.08 | NA   | 0.32 |
| rs9612037 | 22 | 42030712 | 0.12 | 0.11 | NA   | 0.50 |
| rs9626968 | 22 | 45972256 | 0.01 | 0.23 | 0.00 | 0.00 |
| rs5992751 | 22 | 16460154 | 0.20 | 0.20 | NA   | 0.23 |

Chr=Chromosome; Position=genomic coordinate; MAF=minor allele frequency; NA=not available
